1  
2 **Perceived ambiguity of social interactions increases coupling between**  
3 **frontal and temporal nodes of the social brain**

4  
5 Matthew Ainsworth<sup>1,2</sup>, Jérôme Sallet<sup>2,3,4</sup>, Olivier Joly<sup>1</sup>, Diana Kyriazis<sup>1</sup>, Nikolaus Kriegeskorte<sup>1,5</sup>, John Duncan<sup>1,2</sup>, Urs  
6 Schüffelgen<sup>2,3</sup>, Matthew FS Rushworth<sup>2,3</sup>, Andrew H Bell<sup>1,2,3</sup>

7 <sup>1</sup> MRC Cognition and Brain Sciences Unit, University of Cambridge, Cambridge, UK

8 <sup>2</sup> Department of Experimental Psychology, University of Oxford, Oxford, UK

9 <sup>3</sup> Wellcome Centre for Integrative Neuroimaging, University of Oxford, Oxford, UK

10 <sup>4</sup> Univ Lyon, Université Lyon 1, Inserm, Stem Cell and Brain Research Institute U1208, Bron, France

11 <sup>5</sup> Zuckerman Mind Brain Institute, Columbia University, New York, USA

12  
13  
14  
15 Corresponding Author: Matthew Ainsworth, Dept. of Experimental Psychology, University of Oxford, Tinsley  
16 Building, Mansfield Road, Oxford, OX1 3SR, [matthew.ainsworth@psy.ox.ac.uk](mailto:matthew.ainsworth@psy.ox.ac.uk)

17  
18

## 19 **ABSTRACT**

20 Social behaviour is coordinated by a network of brain regions, including those involved in the perception of social  
21 stimuli and those involved in complex functions like inferring perceptual and mental states and controlling social  
22 interactions. The properties and function of many of these regions in isolation is relatively well understood but little is  
23 known about how these regions interact whilst processing dynamic social interactions. To investigate whether social  
24 network connectivity is modulated by social context we collected fMRI data from monkeys viewing “affiliative”,  
25 “aggressive”, or “ambiguous” social interactions. We show activation relating to the perception of social interactions  
26 along both banks of the superior temporal sulcus, parietal, medial and lateral PFC and caudate nucleus. Within this  
27 network we demonstrate that fronto-temporal connectivity are significantly modulated by social context. Crucially, we  
28 link the observation of specific behaviours to changes in connectivity within our network. Viewing aggressive or  
29 affiliative behaviour was associated with a limited increase in temporo-temporal and premotor-temporal connectivity  
30 respectively. By contrast, viewing ambiguous interactions was associated with a pronounced increase in cingulate-  
31 cingulate, temporo-temporal, and cingulate-temporal connectivity. We hypothesise that this widespread network  
32 synchronisation occurs when cingulate and temporal areas coordinate their activity when more difficult social  
33 inferences are made.

34

35 Keywords: face-processing, monkey, prefrontal, social cognition, FMRI

36Most primates live in complex social environments with large, hierarchically organized groups. Maintaining  
37relationships within these groups impacts on individuals' fitness (Schulke, Bhagavatula, Vigilant, & Ostner, 2010) and  
38requires the ability to both understand the intentions and predict the actions of other individuals within the group.  
39Recent research has identified specific brain regions that appear specialised for different aspects of social cognition and  
40reflect the complexity of a species' social environment (Dunbar & Shultz, 2007; Kudo & Dunbar, 2001).

41These regions range in function and complexity. There are several regions in the frontal and temporal cortices that are  
42involved in the perception of social cues such as facial expressions, body postures, and vocalisations (Bell, Hadj-  
43Bouziane, Frihauf, Tootell, & Ungerleider, 2009; Bell et al., 2011; Diehl & Romanski, 2014; Downing, Jiang, Shuman,  
44& Kanwisher, 2001; Downing, Peelen, Wiggett, & Tew, 2006; Hadj-Bouziane, Bell, Knusten, Ungerleider, & Tootell,  
452008; Kanwisher, McDermott, & Chun, 1997; McCarthy, Puce, Gore, & Allison, 1997; Peelen, Wiggett, & Downing,  
462006; Pinsk et al., 2009; Popivanov, Jastorff, Vanduffel, & Vogels, 2012; Romanski & Diehl, 2011; Scalaidhe, Wilson,  
47& Goldman-Rakic, 1999; Sergent, Ohta, & MacDonald, 1992; Tsao, Moeller, & Freiwald, 2008; Tsao, Schweers,  
48Moeller, & Freiwald, 2008). By contrast, there are regions concentrated in the frontal cortex and also in subcortex  
49involved in more complex aspects of social cognition, such as the evaluation of social rewards (Aharon et al., 2001;  
50Azzi, Sirigu, & Duhamel, 2012; Izuma, Saito, & Sadato, 2008; Rudebeck, Buckley, Walton, & Rushworth, 2006;  
51Sescousse, Li, & Dreher, 2015; Watson & Platt, 2012), monitoring the performance of and learning from conspecifics  
52(Behrens, Hunt, & Rushworth, 2009; Behrens, Hunt, Woolrich, & Rushworth, 2008; Kyoko Yoshida, Saito, Iriki, &  
53Isoda, 2011; K. Yoshida, Saito, Iriki, & Isoda, 2012), and encoding of intentions and mental states of others (Haroush &  
54Williams, 2015; Saxe & Kanwisher, 2003; Saxe, Xiao, Kovacs, Perrett, & Kanwisher, 2004; Wagner, Haxby, &  
55Heatherton, 2012; Wagner, Kelley, Haxby, & Heatherton, 2016; Wittmann, Lockwood, & Rushworth, 2018).

56The connectional properties of these social brain regions have been found, based on their activity at rest to be well  
57preserved between humans and rhesus macaques (Mars, Sallet, Neubert, & Rushworth, 2013; Sallet et al., 2013,  
58Mantini et al 2011). However, these studies only used resting-state fMRI to investigate the neuroanatomical properties  
59of those networks. There is a growing interest in how these regions interact to form functional networks specialised for  
60social behaviour. Sliwa and Freiwald (2017) contrasted responses in the monkey brain to both social interactions  
61between conspecifics and interactions between inanimate objects lacking social associations. They identified a large  
62“social interaction network” that included regions across the frontal, parietal, and temporal cortices as well as  
63subcortical areas (caudate and amygdala). Intriguingly, a smaller network primarily composed of frontal regions was  
64only responsive to social interactions and was largely unresponsive to non-social conditions.

65In the human, Arioli and Canessa (2019) proposed the existence of a similar “social interaction perception” network  
66based on the overlapping characteristics of well-established networks associated with action observation (Gallese,  
67Fadiga, Fogassi, & Rizzolatti, 1996; Rizzolatti & Sinigaglia, 2010) and mentalising (Theory of Mind) (Koster-Hale &  
68Saxe, 2013; Molenberghs, Johnson, Henry, & Mattingley, 2016). This network includes many of the regions mentioned  
69above, including the posterior superior temporal sulcus, temporoparietal junction, medial prefrontal cortex, and the  
70amygdala.

71Clarifying the properties of social brain networks is of great interest, as these networks have been linked to clinically-  
72relevant disruptions to social behaviour (e.g., autism spectrum disorders, (Liao et al., 2010); schizophrenia (Ebisch et  
73al., 2018; Jimenez, Riedel, Lee, Reavis, & Green, 2019; Viviano et al., 2018); social anxiety disorder (Rabany et al.,  
742017; Zhu et al., 2017)). Despite this the majority of studies describing these social networks have either focused on the  
75activities of individual nodes or examined the state of these networks at rest. One notable exception examined

76connectivity between the anterior cingulate cortex and amygdala in the gamma and beta frequency bands when animals  
77made social decisions (Dal Monte et al., 2020). However, this study was limited to connectivity between two nodes  
78(anterior cingulate cortex or ACC and amygdala) during a social decision. It therefore remains relatively unclear how  
79functional relationships between nodes in social brain networks interact during the perception and evaluation of others  
80social interactions.

81In the present study, we sought to address two questions concerning neural responses to social interactions in the  
82monkey brain: 1) how activations and network interactions are affected during the online viewing of social interactions,  
83and more importantly, 2) how these dynamics change with respect to the nature of these interactions.

84We collected functional MRI (fMRI) data from monkeys whilst they freely-viewed video clips of different social  
85interactions between non-human primates. These social interactions included situations where the context was clear  
86(e.g., aggressive, affiliative/grooming) and situations where the nature of the interaction was ambiguous (e.g.,  
87approach). This approach allowed us to explore changes in functional connectivity between regions responsive to social  
88stimuli in order to better understand how the social brain functions as a network.

89

## 90RESULTS

91To characterise the relationships between regions of the monkey brain involved in representing social interactions, we  
92presented videos containing conspecific and visually-similar and closely-related but non-rhesus macaque (*Macaca*  
93*radiata*, i.e., Bonnet Macaques) actors to three rhesus macaques whilst collecting BOLD fMRI data. The videos  
94consisted of 5-20s clips interspersed with blank periods (Figure 1A). Each clip contained monkey actors engaged in  
95natural behaviour with the number, identity and behaviour of the actors as well as the scene location changing randomly  
96between clips (see METHODS AND MATERIALS for additional detail). All three monkeys were rewarded for  
97maintaining their gaze within the borders of the video but were allowed free eye movement within this limit. On  
98average the three monkeys maintained this level of fixation for  $90\pm 3\%$  (M1),  $89\pm 7\%$  (M2) and  $62\pm 8\%$  (M3) of  
99presented video content for each session.

### 100Regions in the Primate Brain responsive to Social Behaviours

101A univariate general linear model (GLM) analysis was conducted to identify regions in the brain that selectively  
102respond to social stimuli (see METHODS AND MATERIALS). This model included regressors based on low-level  
103visual features (ON/OFF, luminance and motion) as well as regressors scoring the number of actors on the screen  
104(Figure 1B).

105When monkeys viewed scenes with only single actors visible, we observed strong bilateral activation in the temporal  
106cortex (Figure 2A; single actor>no actor,  $z\text{-stat}>1.9$ , cluster corrected,  $p<0.05$ ). This activation followed the fundus of  
107the superior temporal sulcus (STS). Within this sulcus, three semi-distinct clusters were arranged along the anterior-  
108posterior direction and extended onto both the superior and inferior banks of the sulcus. No activation was evident  
109outside the temporal cortex.

110

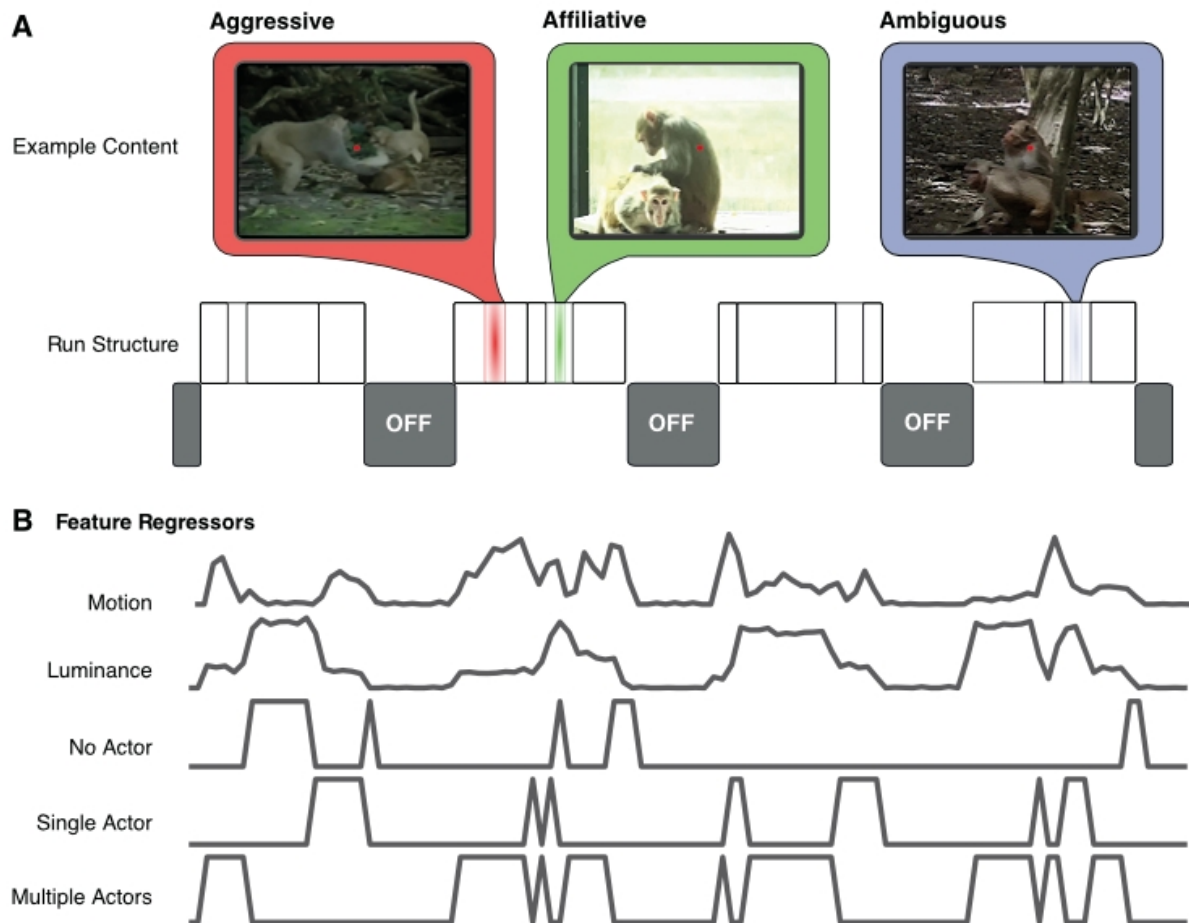

**Figure 1**

111

112 **Figure 1. Video structure and feature regressors.** **A.** Individual runs consisted of 4 video sequences interleaved with  
113 periods of blank. Each video sequence consisted of 5-20 s long clips of macaques engaged in social and non-social  
114 behaviours. Social behaviours were classified as either aggressive interactions (red), affiliative interactions (green) or  
115 ambiguous behaviour (blue). In each video sequence, periods with several immediately-abutted video clips alternated  
116 with 20 s blank periods (labelled "OFF"). **B.** Example regressors used in a GLM analysis to localise visual and social  
117 activity in the brain. Regressors were calculated from the video content and included visual features (video clips  
118 ON/OFF, luminance and motion) and social features (number of macaques present in each scene). Note regressors  
119 shown prior to convolution with the haemodynamic response function.

120

121 By contrast, when monkeys viewed scenes featuring more than one actor regardless of their behaviour, strong activation  
122 was observed in both the frontal and temporal cortices (multiple actors > no actors; Figure 2B). Within the temporal  
123 cortex, activation was again bilateral and closely matched the STS clusters observed when monkeys viewed scenes  
124 containing single actors. Activation within the frontal lobe was less extensive and limited to two discrete clusters. The  
125 larger cluster extended bilaterally along the cingulate gyrus while the smaller cluster was located around the spur of the  
126 arcuate sulcus in the left premotor cortex.

127 Directly contrasting the responses for single vs. multiple actors (irrespective of behaviour) revealed strong activation  
128 within the medial frontal lobe (multiple actors > single actor; Figure 2C). This contrast showed bilateral activation within  
129 the cingulate gyrus and extended in the left hemisphere into the caudate nucleus ( $z\text{-stat} > 1.9$ , cluster-corrected  $p < 0.05$ ).

130 The three regressors of no-interest that accounted for the low-level visual features (video onset/offset, motion and

131luminance) predictably elicited strong activation along both banks of the STS and to a lesser extent in the tertiary visual  
132areas (Figure S1, note differing scales).

### 133**Dynamic connectivity within a Social Network**

134The above data show that activation of prefrontal areas occurred only when monkeys viewed scenes containing multiple  
135monkeys. We therefore examined the functional interactions in the form of dynamic connectivity between frontal,  
136temporal and subcortical regions corresponding to instances where monkeys viewed the different social behaviours. We  
137did so using a progressive four-stage analysis approach and present the results of each stage in order to clearly illustrate  
138how the final analysis was achieved.

139Briefly, we first assessed the suitability of this approach in identifying how social behaviours affect global connectivity  
140within the network by averaging connectivity measures across all ROIs and social behaviours (Stage 1). Next, we  
141examined changes to individual pairwise-connections in response to non-social stimuli (Stage 2) followed by changes in  
142response to any of the social behaviours (Stage 3). Finally, we examined what specific behaviours elicited the most  
143notable changes to pairwise connections within the network (Stage 4).

#### 144(1) *Global changes in response to social behaviours*

145We first defined a “putative social network” consisting of 8 bilateral ROIs (total 16) from clusters identified in the  
146previous analysis. These ROIs were centred on the maximally-responsive voxels identified within the contrasts of  
147interest above and included locations in the temporal cortex (three ROIs located along the STS), the parietal cortex (area  
1487a), the cingulate gyrus (incl. area 24a/b), premotor cortex, and the caudate nucleus (Figure 3A).

149Dynamic connectivity (see METHODS AND MATERIALS) was calculated between all possible pairings of ROIs in  
150this network over an entire session. After preprocessing and concatenating the individual BOLD time-series for each  
151run, time-series were averaged over videos repeated within a session and the resulting changes in connectivity were  
152examined relative to both the visual and social features of the 880-s video sequence (see Figure S2 and METHODS  
153AND MATERIALS for more details).

154We first focused on two measures of connectivity within this network: 1) changes in the average connectivity,  
155calculated across all pairwise connections within the putative social network; and 2) changes in the variance in  
156connectivity, again using the same approach.

157Both of these measures varied considerably over the time-course of the videos with sharp, transient increases in both  
158average connectivity and variance (Figure 3Bi). Peaks in the average network connectivity were generally time-locked  
159with periods during which the monkeys were required to maintain fixation in the absence of visual stimulation (black  
160markers). By contrast, peaks in network variance occurred predominantly during periods of visual activation (red  
161markers, Figure 3Bi & ii).

162This latter point raises the possibility that either the visual and/or social content of the video clips was associated with  
163changes in connectivity across a smaller number of specific connections, rather than a more uniform network-wide  
164change in connectivity (which would have presumably increased the average connectivity, but not the variance).

165

166



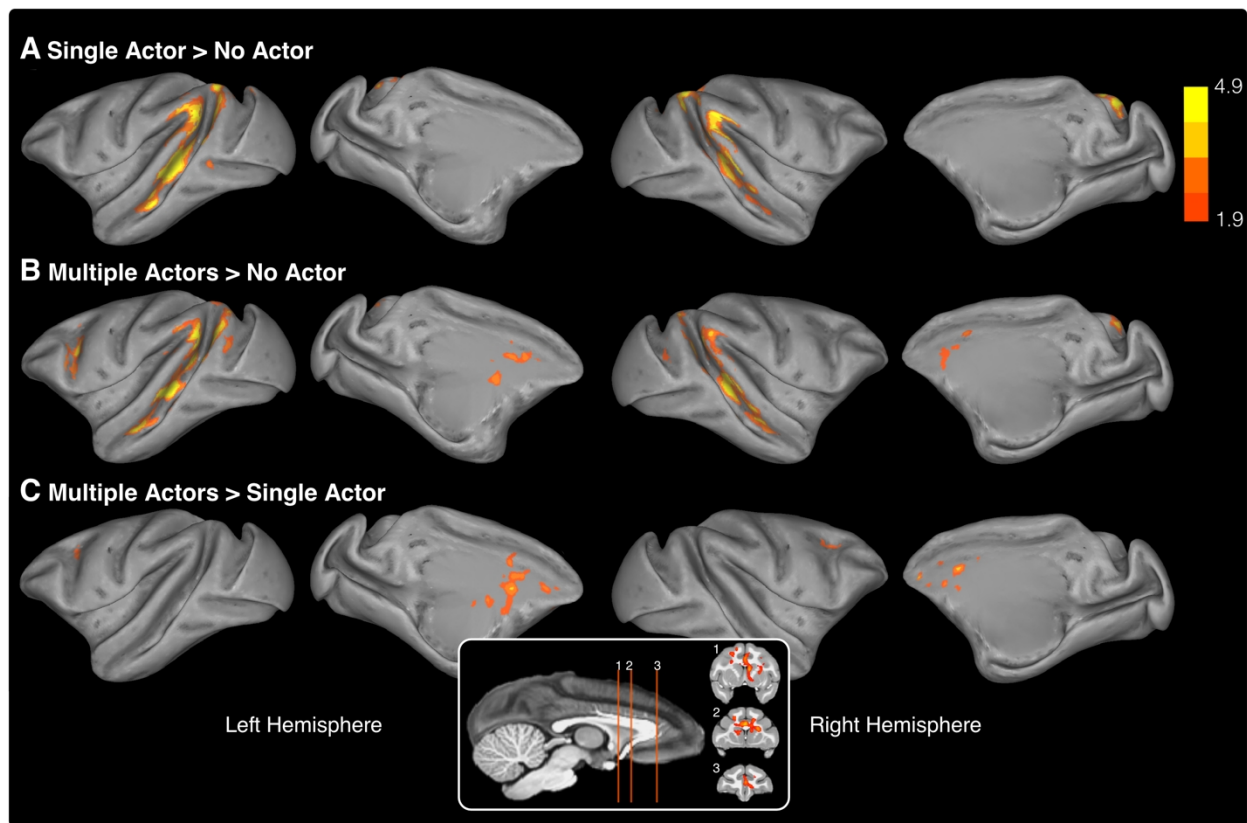

**Figure 2**

167

168 **Figure 2. Cortical activation on viewing single actors and multiple actors engaged in natural behaviour. A-C.**  
169 Inflated brains showing significant clusters from three contrasts derived from the number of actors visible in the videos.  
170 All data presented are from the third level, GLM analysis with combining activation from all three animals. The contrasts  
171 include; scenes with a single actor vs. scenes with no actors visible (**A**), scenes containing multiple actors vs. scenes  
172 with no actors visible (**B**), and scenes containing multiple actors vs. scenes containing single actors, regardless of the  
173 behaviour of the visible actors (**C**). Medial frontal lobe activation from the multiple vs. single actor contrast is shown inset  
174 overlaid on coronal anatomical slices. All data shown survived a cluster correction at  $z\text{-stat} > 1.9$  and  $p < 0.05$ .

175

## 176 (2) *Specific changes to pairwise connections in response to non-social stimuli*

177 We therefore performed a similar analysis, this time focussing on specific pairwise connections within the network.  
178 This analysis revealed that certain periods were marked by selective increases in specific network connections (Figure  
179 3C & D). During blank periods (no video clips), the network was dominated by temporo-temporal connections (Figure  
180 3C). Suprathreshold connections (which we have here defined as the strongest 15% of all pairwise connections) were  
181 primarily interhemispheric, temporo-temporal connections (44% of suprathreshold connections), followed by within-  
182 hemisphere connections in both right and left temporal cortices (22% and 22%, respectively), as illustrated in Figure  
183 3C, right.

184 By contrast, connectivity within the frontal cortex was less evident (accounting for 10% of suprathreshold connections).  
185 These connections were largely inter-hemispheric, linking left and right cingulate cortex (Figure 3C). No intra-  
186 hemispheric fronto-frontal connections or fronto-temporal connections were defined as suprathreshold.

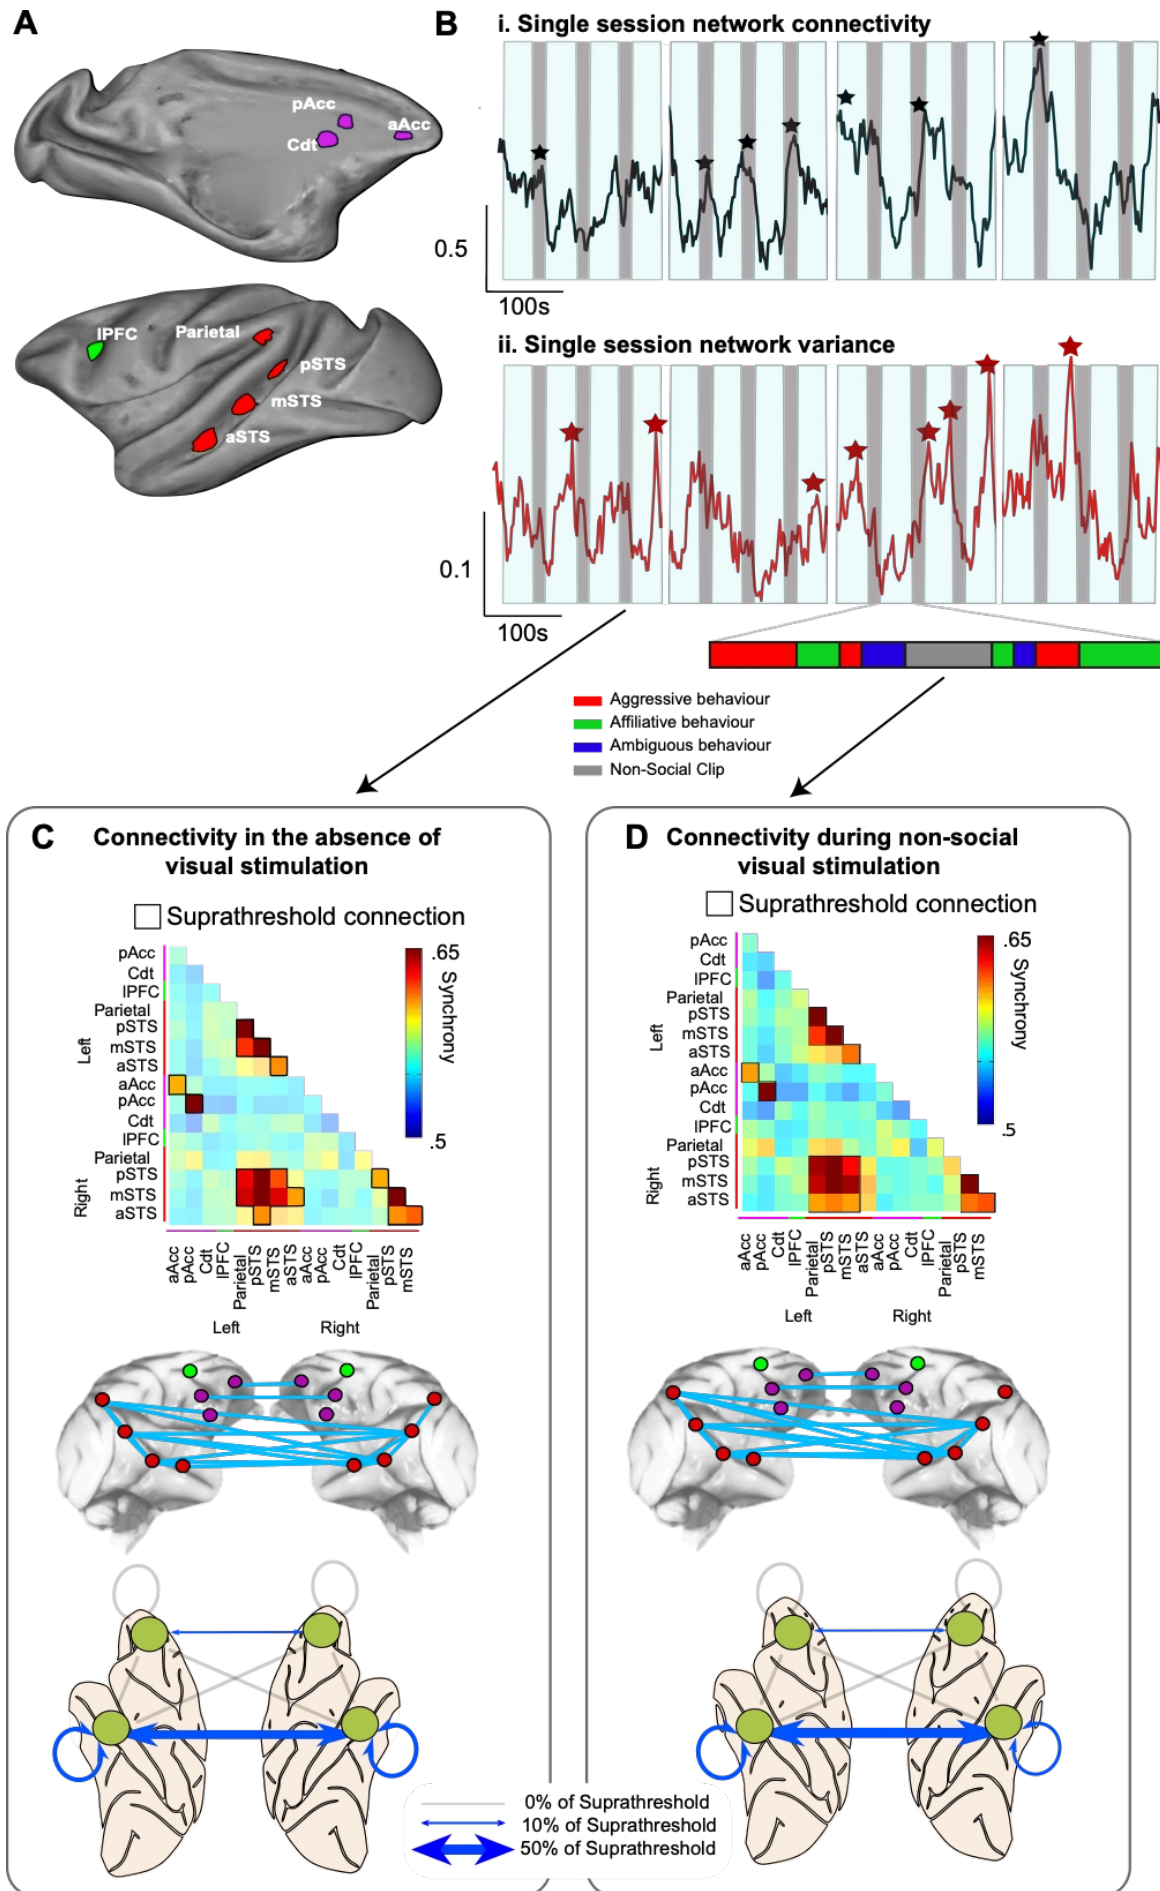



188 **Figure 3. The structure and dynamic connectivity of the putative social network. A.** Lateral and medial views of a  
189 single inflated hemisphere showing the 8 ROIs selected from the z-stat maps in Figure 2 as constituting the core of a  
190 social network. Note the colour scheme for mPFC (purple), IPFC (green) and temporal/parietal ROIs (red) **B.** Single  
191 session examples of the global dynamics of the network. The average dynamic connectivity between ROIs in the  
192 network, calculated using a time-windowed phase synchrony measure (*top*, black trace, calibration 100s and 0.5 AU)  
193 and the average variance in connectivity within the network (*lower*, red trace, calibration 100s and 0.1 AU). Both  
194 examples were averaged over the 880s of unique video content presented in a single session. The ON/OFF structure of  
195 the video is shown behind each trace (movie ON/OFF denoted by light blue/grey bars respectively). Interruptions in the  
196 bars denote the stop/start of each of the four individual runs. **C-D.** Detailed analysis of the structure of the putative social  
197 network in the absence of visual stimulation (**C**) and during non-social visual stimulation (**D**). Connectivity matrices (*top*)  
198 show the strength of all possible connections between ROIs during both these conditions. Suprathreshold connections  
199 (the strongest 15% of connections, outlined in black) were selected from both matrices and the anatomical properties of  
200 the connections visualised with two network schematics. In the first schematic suprathreshold connections (shown in light  
201 blue) are displayed linking the relevant ROIs (coloured according to the above scheme) of the core network  
202 (*middle*). In addition, suprathreshold connections are summarised in a simplified representation linking the left and right  
203 frontal and temporal lobes. The thickness of the connection between these lobes corresponds to the proportion of the  
204 total suprathreshold connections which are present between the lobes (*lower*).

205

206 During periods with non-social video clips (visual scenes lacking any monkey actors), network connectivity was again  
207 dominated by temporo-temporal connections (Figure 3D). These primarily included interhemispheric temporo-temporal  
208 connections (50% of suprathreshold connections) followed again by within-hemisphere connections in both right and  
209 left temporal cortices (17% and 22%, respectively). Again, connections involving frontal regions were less affected  
210 (only 11% of suprathreshold connections involved areas of the frontal lobe) with the only suprathreshold connections  
211 being those linking left and right cingulate cortex, as illustrated in Figure 3D, right. No intra-hemispheric fronto-frontal  
212 connections or fronto-temporal connections were suprathreshold.

### 213 (3) Prefrontal-temporal connectivity is modulated by social information

214 To assess changes in network connectivity associated with viewing specific behaviours, we used a repeated measure  
215 ANOVA consisting of one between-subject factor: monkey (three levels, monkeys M1-M3), and one within-subject  
216 factor of interest: social interactions (three levels aggressive/affiliative/ambiguous, see METHODS AND MATERIALS  
217 for details). For this analysis, we applied a statistical threshold ( $z > 1.66$ ) to the matrix of z-stats for social interactions to  
218 identify connections of interest.

219 This approach revealed that social behaviour was correlated with modulation of predominantly fronto-temporal  
220 connections (Figure 4). Intra-hemispheric fronto-temporal connections accounted for 34% of total suprathreshold  
221 connections (17% of connections for the left and right hemispheres). Interhemispheric fronto-temporal connections  
222 accounted for an additional 34% of total suprathreshold connections. By contrast, fewer suprathreshold connections  
223 were located solely within either the frontal or temporal lobes. Suprathreshold fronto-frontal connections (both linking  
224 left and right frontal lobes and within the right frontal lobe) accounted for 16% of total suprathreshold connections.  
225 Suprathreshold temporo-temporal connections were also sparse and accounted for a further 16% of total suprathreshold  
226 connections. These included intra-hemispheric connections within the left and right temporal lobes and  
227 interhemispheric connections (11, 0 and 5% of total suprathreshold connections respectively).

228 To further examine which specific ROIs were linked by suprathreshold, socially-modulated connections, we calculated  
229 two metrics: degree centrality and eigenvector centrality. These were used to quantify how “central” each ROI is to the  
230 network (Figure 5). Both measures use an ROI’s connectivity to indicate its importance to a network; an ROI’s degree  
231 centrality simply reflects the sum of its connections, while an ROI’s eigenvector centrality gives greater weights to  
232 nodes connected to other well connected nodes (see MATERIALS AND METHODS for more detail).

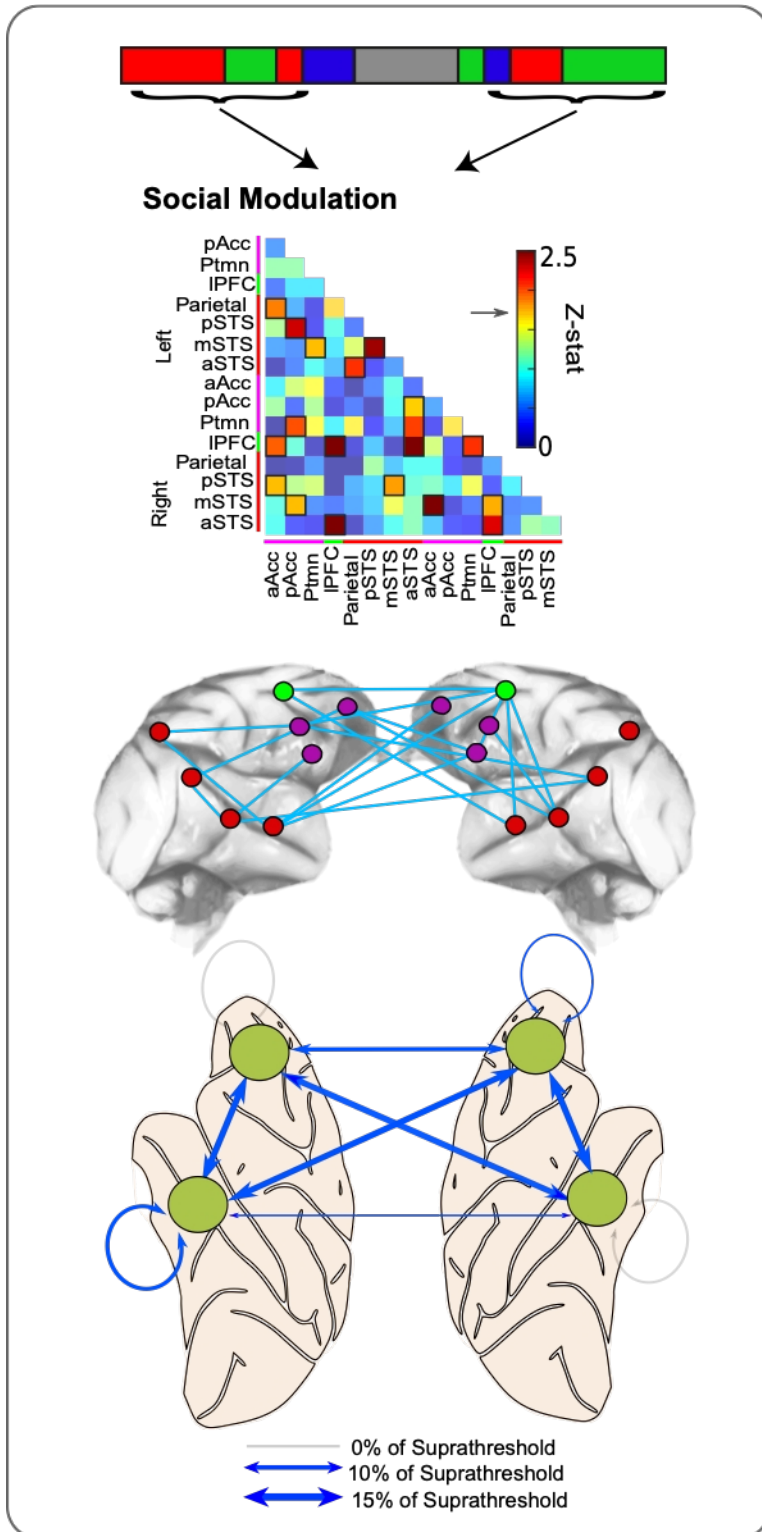

**Figure 4**

233

234 **Figure 4. Social modulation of network connectivity.** Results of a repeated measure ANOVA assessing the degree to  
 235 which network connectivity was modulated by social interaction (within-subject factor with three levels  
 236 aggressive/affiliative/ambiguous, See METHODS AND MATERIALS for details). The z-stat obtained from this analysis  
 237 for each connection is displayed in a summary matrix (*top*). Connections with the strongest social modulation were  
 238 selected with a threshold of  $z > 1.66$  (equivalent to the strongest 15% of connections, suprathreshold connections outlined  
 239 in black). Suprathreshold connections are graphically represented in blue between ROIs in the network (*middle*).  
 240 Simplified graphical representation of connections between the left and right frontal and temporal lobes. The thickness of  
 241 the connecting line denotes the proportion of suprathreshold connections displaying social modulation of connectivity  
 242 (*lower*).

243

244 This analysis revealed a clear distinction within the temporal lobe. In contrast to posterior temporal ROIs, those ROIs  
245 more anterior along the superior temporal sulcus (aSTS & mSTS) exhibited both a greater degree (therefore more likely  
246 to be linked with suprathreshold social modulated connections) and greater centrality (more likely to be connected to  
247 other ROIs with a high number of socially modulated connections). No such distinction was evident within the frontal  
248 lobe. Although ROIs within the cingulate gyrus (notably those in the left hemisphere) exhibited both high degree &  
249 centrality scores the same was true for the premotor cortex ROI (particularly the right premotor cortex ROI).

250

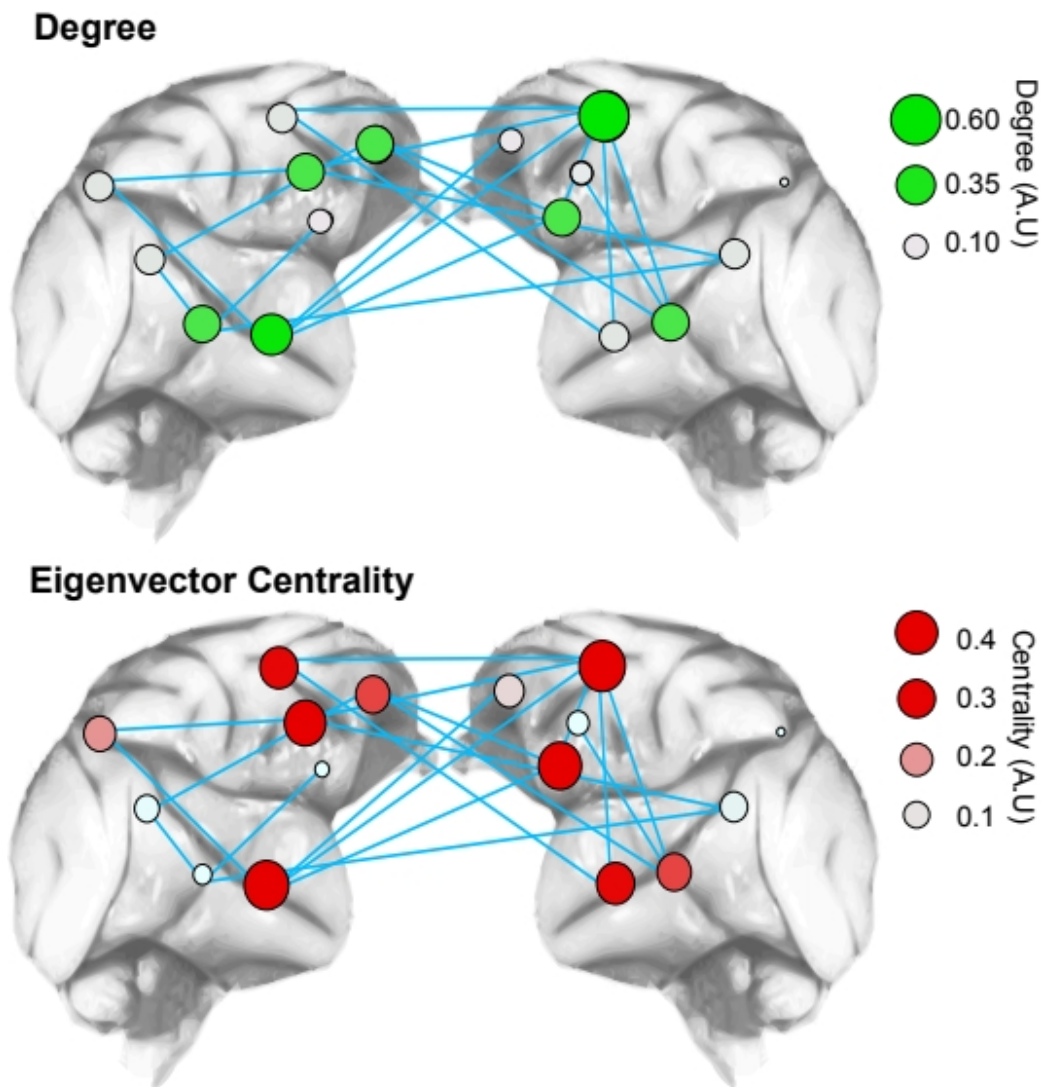

251

**Figure 5**

252 **Figure 5. Network degree and eigenvector centrality of suprathreshold socially modulated connections.**  
253 Graphical representation of degree (*top*) and eigenvector centrality (*bottom*) of each ROI calculated from suprathreshold  
254 socially modulated connections. ROI's with greater degree (green nodes) and centrality (red nodes) indicated as larger  
255 and stronger coloured nodes within the network.

256 **(4) Ambiguous scenes elicit increased functional connectivity in fronto-temporal connections**

257 The above data demonstrate that connectivity, both within the frontal lobe and between the frontal and temporal lobes is  
258 modulated by the nature of social behaviour viewed by a monkey. This analysis does not reveal which specific  
259 behavioural types contained in the video sequences (aggressive, affiliative, or ambiguous behaviour) were associated

260with the observed changes in connectivity – a vital question.

261Previous work has shown how it is possible to link specific changes in network correlations with specific scenes in a  
262video (Russ & Leopold., 2015 ,Hasson et al., 2004). We used a similar approach to examine how connectivity changes  
263in response to the three types of behaviour (Figure 6A). We aligned the average connectivity between ROIs in the  
264frontal and temporal lobes to the onset of the video clips and normalised these values to the prior baseline to show  
265relative changes in connectivity (see MATERIALS AND METHODS & Figure S2, Stage 3). As the previous analysis  
266indicated the existence of socially modulated connections to both cingulate gyrus and premotor ROIs, we explicitly  
267averaged connectivity between both these sets of ROIs and the temporal lobe (Figure 6B upper and low panels  
268respectively).

269This analysis, shown in Figure 6, revealed differences in connectivity within our network depending on the specific  
270behaviour viewed. Firstly, increased connectivity between the cingulate gyrus and temporal lobe was predominantly  
271driven by video clips where the behaviour was classified as ambiguous rather than clips where the behaviour was  
272clearly affiliative or aggressive. Specifically, viewing clips containing ambiguous behaviour was associated with  
273significant increases in temporo-temporal, cingulate-temporal and cingulate-cingulate connectivity (Figure 6B, blue  
274traces). By contrast, viewing clips containing aggressive behaviour was associated with significant increases in  
275temporo-temporal connectivity only with no significant changes in cingulate-temporal or cingulate-cingulate  
276connectivity (Figure 6B, red traces). Finally, viewing clips showing clear affiliative behaviour between monkeys was  
277not associated with any changes in temporo-temporal or cingulate-temporal connectivity but was associated with a  
278small significant increase in both cingulate-cingulate connectivity (Figure 6B, green traces) and premotor-temporal lobe  
279connectivity.

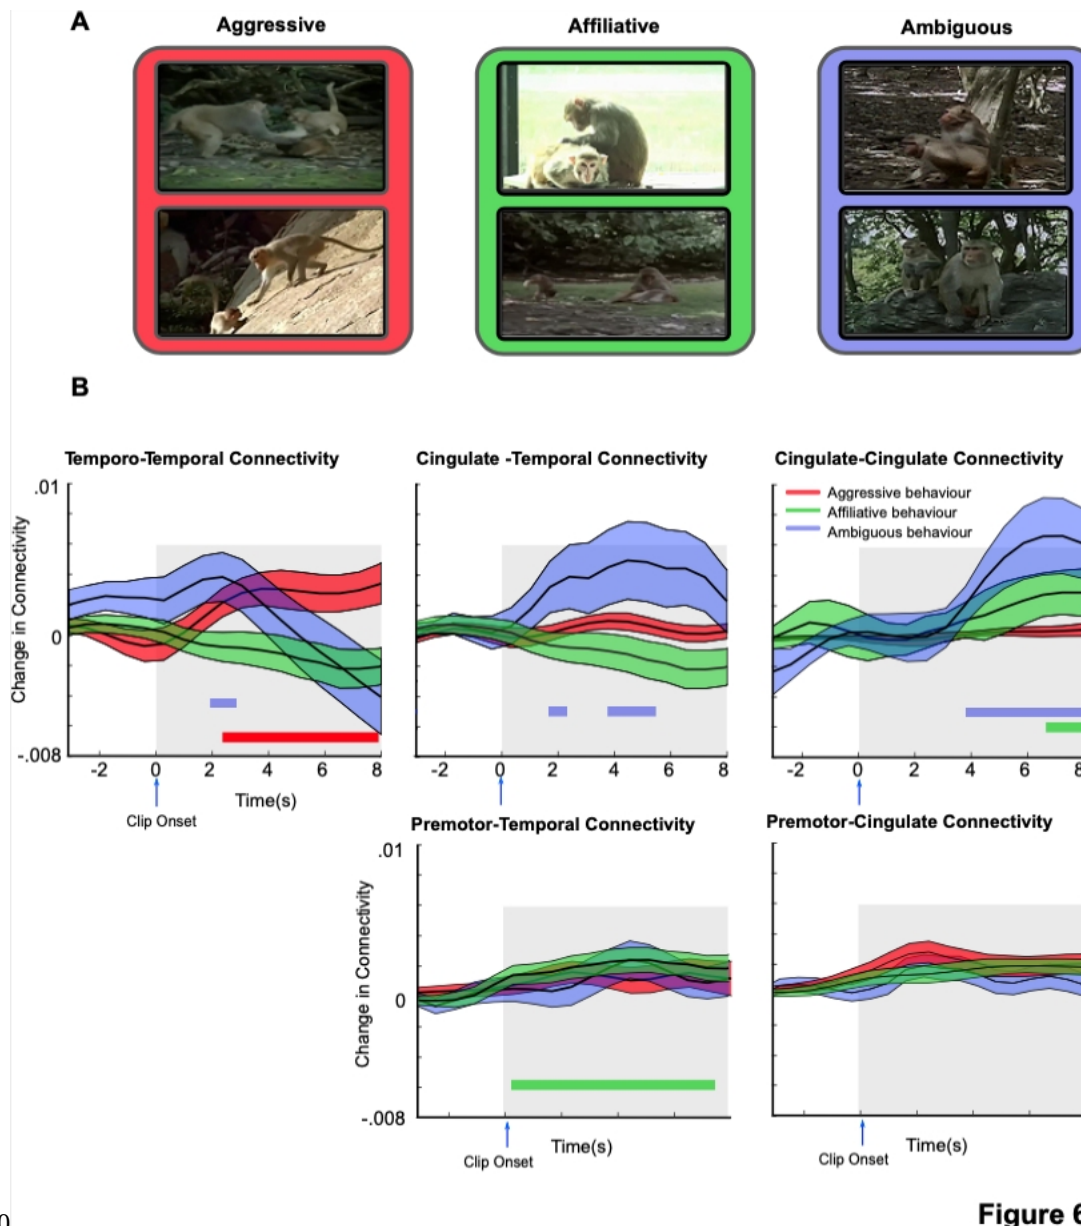

**Figure 6**

280

281

282 **Figure 6. Viewing ambiguous behavioural interactions drives increased connectivity between cingulate gyrus**  
 283 **and temporal lobe.** The average time-course of connectivity between the cingulate gyrus and premotor cortex and  
 284 temporal lobe ROIs aligned to the onset of clips in which the behavioural interactions were classified as either aggressive  
 285 (red), affiliative (green) or ambiguous (blue). **A.** Example frames of the three behaviours contained in the clips. **B.** The  
 286 clip-onset triggered connectivity was calculated from temporo-temporal (*upper left panel*), cingulate-temporal (*upper*  
 287 *middle panel*), cingulate-cingulate (*upper right panel*), premotor-temporal (*lower middle panel*), and premotor-cingulate  
 288 (*lower right panel*) connections for each of the three behaviours viewed. Consistent with previous analyses only the  
 289 strongest 15% of connections were considered. Coloured bars denote timepoints with significantly increased connectivity  
 290 at  $p < 0.05$ . Significance was determined by one-tailed t-test against surrogate data generated with the same mean and  
 291 variance as the pre-clip baseline. To correct for multiple comparisons cluster correction was applied across timepoints at  
 292  $p < 0.05$ .



## 293 **DISCUSSION**

294 We have examined how regions of the monkey brain responsive to social stimuli coordinate their activities in response  
295 to dynamic and complex social interactions. Monkeys were shown short video clips involving one or more monkey  
296 actor and which broadly fell into one of three categories: affiliative, aggressive, and a third category where the nature of  
297 the interaction was ambiguous to the viewer (e.g., clips of one actor approaching another, or two actors approaching one  
298 another).

299 Viewing clips of social interactions activated several brain regions, concentrated within the frontal and temporal lobes  
300 (Figure 2). Critically, although temporal lobe regions were activated regardless of the number of actors, frontal areas  
301 were only recruited whilst monkeys viewed clips with more than one actor. Connectivity across this social brain  
302 network, and in particular between/within the frontal and temporal regions varied according to the behaviour viewed by  
303 the monkeys. Viewing affiliative behaviour was associated with a small significant increase in connectivity between  
304 premotor and temporal lobe ROIs, but had no impact on cingulate-temporal lobe connectivity. By contrast, significant  
305 increases in connectivity within the cingulate gyrus and between cingulate gyrus and temporal ROIs were observed  
306 when monkeys viewed ambiguous behaviour (Figure 6). We propose that the increase in cingulate-cingulate and  
307 cingulate-temporal lobe connectivity associated with viewing ambiguous social interactions may reflect the increased  
308 neural processing necessary to make accurate predictions about upcoming behaviours that are unnecessary or reduced  
309 when subjects view more predictable interactions.

310 Here, we first present how our selection of nodes in our social network relates to pre-existing literature. Before,  
311 discussing why certain social contexts may lead to increased functional connectivity between nodes in this network.

### 312 **Composition of a social network**

313 Recent advances in the field of social cognition, including in the non-human primate brain have led to a better level of  
314 understanding of the individual roles for these regions (Platt, Seyfarth, & Cheney, 2016). For our purposes, we selected  
315 a subset of brain regions on the basis of which areas were reliably activated by our stimuli using our imaging protocols.  
316 We grouped these regions into a “putative social network”.

317 The vast majority if not all of the regions in our putative social network are well-established as being involved in social  
318 cognition. To begin, our social network included three bilateral ROIs along the STS, presumably corresponding to the  
319 canonical face-selective regions (Bell et al., 2009; Pinsk et al., 2009; Tsao, Moeller, et al., 2008). Although we did not  
320 independently assess the boundaries for body-part selective regions, they are typically located immediately adjacent to  
321 face-selective regions (Bell et al., 2009; Pinsk et al., 2009), and so we can assume our STS-regions incorporate body-  
322 part selectivity as well.

323 The contribution of these regions to our social perception task may seem self-evident. And yet, more recent structural  
324 studies have shown the STS to be sensitive to the composition and hierarchy of the monkey actors, not just their identity  
325 (Noonan et al., 2014; Sallet et al., 2011). It is possible that in addition to participating in the “simple” visual processing  
326 and reconstruction of the images (e.g., extracting the visually-derived semantic codes as proposed by (Bruce & Young,  
327 1986), these regions are playing a more complex role in evaluating non-visual identity-derived semantic features of the  
328 actors, such as their degree of dominance.

329 The two ROIs located in the cingulate cortex also have a role in social cognition in both humans and non-human



330primates. In particular, the cingulate gyrus has been shown to be central to social valuation (Apps & Ramnani, 2014; S.  
331W. Chang, Gariépy, & Platt, 2013; Rudebeck et al., 2006). Adjacent areas of cingulate cortex and other medial frontal  
332regions have also been implicated in tracking the behaviour and intentions of other agents (Fatfouta, Meshi, Merkl, &  
333Heekeren, 2018; Haroush & Williams, 2015; Hill, Boorman, & Fried, 2016; Lockwood & Wittmann, 2018; Wittmann  
334et al., 2016; Kyoko Yoshida et al., 2011; K. Yoshida et al., 2012).

335In addition, our network included a premotor ROI that was located near the spur of the arcuate sulcus. This is notable,  
336as premotor cortex is increasingly being implicated in social cognition. For example, detailed single neuron recordings  
337have revealed sub-populations of mirror neurons in premotor area F5 that respond to actions essential for judging social  
338hierarchy and status including gaze direction (Coudé et al 2016) and lip smacking (Ferrari et al 2003). Furthermore,  
339Sliwa & Freiwald recently demonstrated significant overlap between two contrasts: one mapping social interactions and  
340the other localisation of the mirror neuron system (Sliwa et al 2017, Nelissen et al 2011), arguing that this overlap  
341indicated a role for mirror neurons in processing social intentions of an interaction as well as simple motor  
342understanding of the interaction.

343Finally, we observed activation in the caudate nucleus. While we cannot speculate what specific role caudate may serve  
344in interpreting social behaviour, the area's contribution to social cognition in general is becoming more clear. It has  
345recently been associated with the default mode network (Alves et al., 2019), which itself has been linked to the social  
346brain (Mars et al., 2012). In humans, responses to monetary and social rewards have been associated with striatal  
347activity (Izuma et al., 2008). In monkeys, feedback for self vs. others is discriminated by striatal neurons (Baez-  
348Mendoza, Harris, & Schultz, 2013; Baez-Mendoza, van Coeverden, & Schultz, 2016). Closer to our protocol, Sliwa and  
349Freiwald (Sliwa & Freiwald, 2017) found that caudate was activated during viewing of social scenes; and Noonan and  
350colleagues (Noonan et al., 2014) found that the volume of grey matter in the caudate covaried with social status in  
351macaques.

352One notable absence in our social network was the amygdala – we did not observe statistically significant activation in  
353the amygdala for any of our social videos, despite its well-established role in face processing and social behaviour.  
354There are at least two possible explanations. The first is a technical limitation, which is that the amygdala is difficult to  
355image in monkeys, particularly larger male monkeys who have extensive musculature on either side of their skulls. This  
356additional muscle mass increases the distance between the receiver coil elements and the target structure, thus inhibiting  
357signal detection. However, we note that previous studies which have used either the same experimental setup (Chau et  
358al., 2015) or similar study design (Sliwa & Freiwald, 2017) have found amygdala activity. Therefore, a second  
359explanation is that while the amygdala may have indeed been active during our task, it was equally active across all  
360conditions and thus no significant differences were observed. This would fit with more modern studies of amygdala  
361function that highlight its role in generalised linking of social and non-social stimuli to outcomes rather than being, for  
362example, a “fear module” (i.e., selectively activated by specific social behaviours, contexts, or stimuli).

### 363**Role of prefrontal recruitment in interpreting social interactions**

364The most notable observation in our study was the increased functional connectivity of the cingulate cortex while  
365monkeys observed ambiguous but not clearly affiliative or aggressive social interactions between multiple actors. In the  
366latter two cases, the monkeys viewing the video clips would not be required to make any judgments or predictions about  
367the nature of the interaction – as it was clearly depicted in the video. On the other hand, even in a passive viewing case,  
368it is possible that the monkeys viewing the ambiguous clips might automatically infer the ultimate outcome of the

369actors' behaviour.

370In this scenario one interpretation is that inferring the consequences or outcomes of ambiguous social behaviour, even  
371without an active task component, not only requires regions of the brain where neurons encode the social features of  
372stimuli (eg. face patches in the inferior temporal cortex) but also areas of the medial prefrontal cortex. This hypothesis  
373is supported by electrophysiological studies of medial prefrontal cortex in non-human primates. These studies have  
374revealed neurons within the ACC encode a range of information essential for making social decisions including; shared  
375reward experience (Chang, Garipey, & Platt, 2013), the actions of other animals (Kyoko Yoshida, Saito, Iriki, & Isoda,  
3762011;) and a prediction of other animals future decisions (Haroush & Williams, 2015). Furthermore, recent research has  
377revealed that synchrony between neurons of the ACC and other brains areas, in this instance the amygdala, can be  
378modulated by social context (Dal Monte et al., 2020). Dal Monte et al revealed that coherence between neuronal  
379activity recorded from the ACC and amygdala was increased when animals shared a reward but decreased only self  
380rewarded.

381However, it should be noted that these studies detail medial prefrontal activity whilst NHPs were required to make  
382decisions based social cue or information, rather than observing social interaction between other animals. Further,  
383evidence for the recruitment of prefrontal cortex during the viewing of social interactions has been observed in recent  
384fMRI studies in humans. For example, Wagner et al. (Wagner et al., 2016) had human participants passively view  
385movie clips while undergoing fMRI. While they consistently found frontal, temporal, and parietal activation during the  
386movie, they noted that dorsomedial PFC was most engaged during scenes that involved social interactions between  
387characters in the movies; raising the possibility that different regions are active during scenes where some behavioural  
388assessment may be necessary.

389Sapey-Triomphe et al. (Sapey-Triomphe et al., 2017) presented point-light images of people either interacting or not  
390interacting to participants ranging in age from 8-41 years of age. The participants were required to state whether the  
391images were interacting or not. Across all age groups, STS, middle temporal gyrus, anterior temporal lobe, and inferior  
392frontal gyrus were activated during the social interactions. However, stronger activation was observed in frontal,  
393parietal, and striatal (caudate) areas – that is, structures implicated in mentalising behaviour – in adults, who were also  
394more successful at classifying the point-light behaviours. Finally, Gardner et al. (Gardner, Goulden, & Cross, 2015)  
395demonstrated that increased familiarity with videos of subjects performing dance moves resulted in decreased  
396correlations within an action-observation network.

397Collectively, these results highlight two potential features of dynamic interactions in social networks. First: that  
398interactions between frontal, parietal, and temporal cortices are not static but rather change dynamically depending on  
399the features and nature of the social stimuli being presented. Second, making inferences or active interpretations of  
400social interactions (rather than passive viewing of social scenes) appears to recruit additional frontal activation.

401Our data parallel these conclusions by showing the greatest amount of coherence among nodes in our putative social  
402network when monkeys were viewing ambiguous social scenes, as compared to predictable scenes. Therefore, we  
403speculate that this additional frontal recruitment reflects the additional cognitive demands of deciphering ambiguous  
404social scenes.

## 405Future Directions

406This study represents an early step towards understanding the role of frontal, striatal and temporal cortex in social  
407cognition. Critically, our task was a passive task – the monkeys were not required to make judgements about the

408behaviour of the actors. This limits our ability to guess what information might be passing between the frontal and  
409temporal regions. Yet, there is an increasing number of studies examining social behaviour between more than one  
410subject (Grabenhorst, Báez-Mendoza, Genest, Deco, & Schultz, 2019; Haroush & Williams, 2015; K. Yoshida et al.,  
4112012), so it is becoming more feasible to conduct experiments involving two or more monkeys interacting with one  
412another. To fully understand how brain regions involved in social cognition interact and what type of information  
413passes between them will likely require such experiments. Future experiments will seek to add a behavioural / decision-  
414making component to these type of experiments – for example, having the animals guess what the outcome of different  
415ambiguous situations might be; possibly having them make predictions about upcoming interactions. This way, we may  
416take one step closer to an understanding of the degree to which non-human primates exhibit rudimentary “theory of  
417mind”-like abilities, and what role regions such as those discussed in this study might play in that cognitive function.

418Second, fMRI is limited in its ability to reveal the nature of information being passed from one region to another. This  
419technique can identify circuits of interest to study with a more suitable method that can clarify the nature of the  
420millisecond-by-millisecond information being passed between nodes in a complex cortical network. For example, how  
421are the new information requirements in situations when animals are viewing ambiguous social interactions  
422communicated to/from frontal and temporal regions? How are the neural representations within temporal cortex of the  
423actors being updated or modulated while the scene plays out? These are questions that are perhaps better addressed  
424using techniques with better temporal resolution compared with MRI-based approaches. No doubt, such experiments  
425will yield exciting new insights as to the role of frontal/temporo- and striato/caudal interactions in social cognition.

## 426 **MATERIALS AND METHODS**

427 All procedures were conducted under licenses granted by the United Kingdom (UK) Home Office in accordance with  
428 the UK Animals (Scientific Procedures) Act of 1986, after approval from the University of Oxford local ethical review  
429 panel and the UK Home Office Animal Inspectorate. All husbandry and welfare conditions complied with the  
430 guidelines of the European Directive (2010/63/EU) for the care and use of laboratory animals.

### 431 **Animals**

432 Three adult male monkeys (*Macaca mulatta*, M1, M2 and M3), purpose-bred within the UK, were used in the study.  
433 The monkeys were aged 7-8 years old and weighed 10-13 kg at the time of data collection. All monkeys lived in large  
434 communal rooms (but with separate housing areas) with several other macaques with whom they could visually interact.  
435 Monkeys M1 and M2 were pair-housed whereas M3 was singly-housed. All monkeys were kept on a 12-hr light/dark  
436 cycle and were given free access to water on non-testing days, and at least 14-hr access to water on testing days.  
437 Veterinary staff and animal technicians performed regular health and welfare assessments, including formalized  
438 behavioural monitoring. Prior to fixation training all monkeys were implanted with MR compatible polyether ether  
439 ketone (PEEK) head-posts (Rogue Research, Montreal, CA) and ceramic screws (Thomas Recordings GmbH) under  
440 aseptic conditions (for further details see (Bell et al., 2009; Chau et al., 2015)).

### 441 **Experimental set-up**

442 Stimulus presentation, reward delivery and eye calibration were controlled using PrimatePy, an implementation of  
443 PsychoPy (Peirce, 2007) modified for primate research (Baumann et al., 2015; Joly, Baumann, Balezeau, Thiele, &  
444 Griffiths, 2014). Stimuli were projected onto a screen placed 19 cm in front of the monkeys. Eye position was recorded  
445 using an MR-compatible camera (MRC Systems GmbH, Heidelberg, De) and horizontal and vertical eye position were  
446 down-sampled to 25Hz and stored for offline analysis along with reward delivery timings and TR pulse count.

### 447 **Stimuli and data collection**

448 We used four different 220 s video sequences (total video length 880 s) presented in separate runs. For each sequence,  
449 there were between three and four runs per daily session. Each video sequence consisted of sixteen clips of either 5, 10  
450 or 20 s long, interspersed with 20 s blank sections. A fixation cue (red circle, 0.3 deg) was visible during both video  
451 clips and blank periods of the sequences (Figure 1A). Throughout the sequences, monkeys were rewarded for  
452 maintaining their gaze within the boundaries of the videos (largest dimension set to 13 deg). Clips used in the video  
453 sequences depicted either conspecifics or the Bonnet macaque (*Macaca radiata*), a closely related species within the  
454 *Macaca* group. The clips were obtained from three sources: two nature documentaries and a set of clips filmed within a  
455 local breeding centre. Clips featuring monkeys contained either 1 or 2+ actors engaging in different social behaviours.  
456 Prior to data collection all monkeys were trained using alternative video footage consisting of sporting events. During  
457 data collection M1 participated in 12 sessions (total volumes: 18,040), M2, 12 sessions (total volumes: 16,720) and M3,  
458 11 sessions (total volumes: 15,400).

### 459 **MRI Data acquisition**

460 Imaging data were collected using a 3T MR scanner and a four-channel phased-array receive coil in conjunction with a  
461 radial transmission coil (Windmiller Kolster Scientific, Fresno, USA). Both fMRI images and proton-density weighted  
462 reference images were collected while awake animals were head-fixed in a sphinx position in an MR-compatible chair  
463 (Rogue Research, Montreal, CA). fMRI data were acquired using a gradient-echo T2\* echo planar imaging (EPI)  
464 sequence with 1.5x1.5x1.5 mm resolution, 32 ascending slices, TR = 2 s, TE = 29 ms, flip angle = 78. Proton-density  
465 weighted images using a gradient-refocused echo (GRE) sequence (TR=10 ms, TE= 2.52 ms, flip angle= 25) were  
466 acquired as reference for body motion artefact correction during pre-processing. T1-weighted MP-RAGE images  
467 (0.5x0.5x0.5 mm resolution, TR = 2,500 ms, TE = 4.01 ms, 3-5 sequences per image) were acquired from each of the  
468 three monkeys in separate scanning sessions and were collected under general anaesthesia (see (Ainsworth et al., 2018;  
469 Mitchell et al., 2016) for further details of anaesthesia protocols and T1 image acquisition).

## 470 Data Analysis

### 471 *fMRI pre-processing*

472 Initial fMRI data pre-processing was carried out on a run-by-run basis using Matlab toolboxes developed to correct for  
473 common artefacts in monkey functional imaging (Offline Sense and Align EPI toolboxes, Windmiller Kolster  
474 Scientific, Fresno, USA). Data were first reconstructed offline from raw image files using SENSE reconstruction to  
475 reduce Nyquist/ghost artefacts (Kolster et al., 2009). Non-linear motion artefacts in the data were corrected on a slice-  
476 by-slice basis using a 3rd order polynomial to align all volumes within a run to an ideal EPI reference image (Kolster,  
477 Janssens, Orban, & Vanduffel, 2014).

478 Further pre-processing of the reconstructed and motion corrected data was carried out using functions from both AFNI  
479 (Cox, 1996) and FSL (fMRI of the Brain (FMRIB) Software Library (Jenkinson, Beckmann, Behrens, Woolrich, &  
480 Smith, 2012)). Individual runs were concatenated to yield a single 4D data file for each session and the resultant data  
481 were skull stripped and signal outliers were removed (using 3dDespike from the AFNI package, (Cox, 1996)).  
482 Remaining volumes that were contaminated by excessive motion were identified based on the volume to volume  
483 variance (fsl\_motion\_outliers using the dvars option, (Power, Barnes, Snyder, Schlaggar, & Petersen, 2012)). For each  
484 session, individual volumes with variance greater than the session mean plus two and a half times the session standard  
485 deviation were identified as outliers and modelled in further analysis as nuisance regressors. For each monkey, the  
486 average percentage of volumes per session identified in this way were; M1 4±2%, M2 6±1% and M3 7±1%.

487 Data were registered to the NMT standard monkey atlas (Seidlitz et al., 2018) with a two-step registration process. First,  
488 the mean EPI image for each session was registered to the relevant monkey's high resolution T1-weighted structural  
489 image. This was achieved by boundary-based registration of mean images, with field maps used to simultaneously  
490 correct for EPI field distortions (Greve & Fischl, 2009; Jenkinson, Bannister, Brady, & Smith, 2002; Jenkinson &  
491 Smith, 2001). Each monkey's T1 structural image was then registered to the NMT template image within 9-degrees of  
492 freedom. For each session, the two relevant transformation matrices were combined and saved for further analysis.  
493 Segmentation of T1 structural images to generate grey, white matter and CSF masks was achieved using FAST (Zhang,  
494 Brady, & Smith, 2001) and masks for each monkey were transformed into EPI-space for use in further analysis. Finally,  
495 during initialisation of the general linear model (GLM, see below for details), fMRI data were spatially smoothed (3mm  
496 FWHM), temporally filtered (3-dB cut-off 100s), and intensity normalised.

497

### 498 *Video feature regressors*

499 Regressors coding for visual and social features of the stimuli were created on a frame by frame basis from the content  
500 of the videos (examples shown in Figure 1B). First, a binary video ON/OFF regressor was created in which ones  
501 corresponded to frames with video content and zeros for frames during blank fixation periods. Two additional  
502 regressors were created based on the overall luminance and total motion of each frame of the video. Total motion  
503 between video frames was calculated using a block matching method with video frames divided into 25x25 pixel blocks  
504 (Block Matching function, Computer Vision System Toolbox, Matlab 2014a, Mathworks). Finally, three binary  
505 regressors were created based on the number of monkeys visible on each frame (no monkeys, one monkey and two or  
506 more monkeys). Video content was manually scored on a frame-by-frame basis and assigned to the appropriate  
507 regressor. All regressors were downsampled to 0.5Hz to match the 2 s TR of the fMRI sequence. Prior to convolution  
508 with a gamma function (SD 1.5 s, mean lag 3 s), all regressors were modified such that volumes in which the monkey  
509 failed to fixate for more than 80% of that volume were set to zero.

### 510 *Whole brain GLM analysis*

511 We conducted an initial analysis to identify brain regions that respond selectively depending on number of actors  
512 (Figure 2). We used a multilevel, univariate GLM analysis using the FSL FEAT tool (Woolrich, Behrens, Beckmann,  
513 Jenkinson, & Smith, 2004). The first level GLM in this analysis was carried out on the processed 4D fMRI data of each  
514 session. The model at this level included regressors for low level visual features (Video ON/OFF, total motion between  
515 video frames and overall luminance) as well as the regressors of interest (number of actors, 0, 1 or multiple). Three  
516 contrasts of interest were included in the model to identify areas of the brain activated by viewing differing numbers of  
517 animals: one actor vs. no animals, multiple actors vs. no animals and multiple vs. single actors. In addition, individual  
518 regressors were included in the model for each volume identified as being contaminated by excessive motion using  
519 `fsl_motion_outliers` (described above). The results from the first level analyses were then combined in three, second-  
520 level mixed-effects GLM's (FLAME 1 & 2), corresponding to one for each monkey. We then combined these into a  
521 third, final group-level analysis consisting of a further fixed-effects GLM (Woolrich et al., 2004). Significant clusters  
522 were identified from the z-stat images using a threshold of  $z > 1.9$  and cluster-correction of  $p < 0.05$ .

### 523 *Social network ROI definition*

524 ROIs within our putative social network were defined based on the activation clusters for two contrasts: single>no  
525 monkeys and multiple>no monkeys. Local maximal voxels were identified within each cluster obtained from each of  
526 these contrasts. To ensure ROI size was consistent across the left and right hemispheres, all maximal voxels were  
527 projected onto a single hemisphere and the strongest eight voxels were selected. These eight voxels were then mirrored  
528 in both hemispheres and a total of 16 spherical ROIs with a diameter of 4mm were generated across the two  
529 hemispheres (8 per hemisphere). We chose to focus on only 8 ROIs per hemisphere as this gave a reasonable  
530 distribution of well-sized ROIs across frontal and temporal cortex, without including spurious clusters.

531 ROIs were masked according to the LV-FOA-PHT cytoarchitectonic standard atlas (Van Essen, Glasser, Dierker, &  
532 Harwell, 2012) such that each ROI was constrained to a single cortical area and there was no overlap between adjacent  
533 ROIs.

### 534 *Calculation of dynamic connectivity*

535 Prior to the calculation of dynamic connectivity between ROIs, the mean BOLD signal from all sessions from each ROI



536was filtered using a GLM incorporating two confound time-series: one generated from the CSF mask and another  
537derived from timestamps denoting the onset of the reward pulses. The residual BOLD time-series obtained from this  
538model was used for the subsequent connectivity analysis.

539Dynamic connectivity was assessed by the pairwise calculation of relative phase synchrony between all ROIs  
540(Rosenblum, Pikovsky, & Kurths, 1996). In contrast to correlation-based measures of connectivity, relative phase  
541synchrony provides a measure of coherence unbiased by the amplitude of the signals. However, phase synchrony  
542measures are sensitive to the frequency content of paired signals. Previous studies have considered both within (1:1)  
543and across frequency (1:n) phase synchrony (Palva, Palva, & Kaila, 2005). In this study, no assumptions were made  
544about specific frequency coupling and phase synchrony was calculated from 0.01Hz to 0.5Hz. Fourier analysis of the  
545bold time series revealed peaks evident at 0.02Hz and 0.04Hz but all frequencies in the aforementioned range are  
546considered in all subsequent analyses (Figure S3).

547As with previous dynamic connectivity studies, phase synchrony was calculated for short overlapping windows of  
548paired time-series. The length of sliding windows is typically limited by decreased signal-to-noise ratio and increased  
549variability as window length decreases (Hutchison, Womelsdorf, Gati, Everling, & Menon, 2013) while others have  
550suggested a minimum window size of 33 s is required to reveal stable modular architecture within the brain (Jones et  
551al., 2012). Comparable window lengths have been used in previous dynamic connectivity studies of resting state activity  
552(C. Chang, Liu, Chen, Liu, & Duyn, 2013; Hutchison et al., 2013). We therefore calculated relative phase synchrony  
553between the instantaneous phase of each pair of signals over a 32s time window. To ensure the subsequent phase  
554synchrony was calculated with sufficient temporal resolution to reveal changes linked to events within the videos, each  
555window was offset by 2s and overlapping the adjacent window by 30s (Figure S2, Stage 1).

556All synchrony values for each session were arcsine transformed to account for any values at the extremes. For each  
557session, the normalised synchrony values were averaged across repeated viewings of the videos to yield a time-course  
558corresponding to the complete 14.8 min of unique video content (Figure S2, Stage 2).

### 559*Statistical analysis of dynamic connectivity*

560Before analysing dynamic connectivity within our network relative to social behaviours, we first validated the  
561technique. Initially, we examined global connectivity within the network over the timecourse of the scanning sessions  
562by calculating the mean connectivity and mean variance across all pairwise connections in the network. We then  
563calculated the mean strength of each connection during periods of non-interest (blank periods in the video and non-  
564social content) and used a threshold selecting for the strongest 15% of connections to view the structure of the network.

565To assess the extent to which viewing different social interactions modulated network connectivity, we averaged the  
566phase synchrony values for each pairwise connection between ROIs within the network on a session-by-session basis  
567for three different network states. These states corresponded to the manually-scored time-courses for scenes containing  
568multiple actors engaged in three different behaviours: (1) affiliative behaviour (e.g., lip smacking, grooming behaviour,  
569etc.), (2) aggressive/dominant behaviour (e.g., piloerection, teeth baring, and/or physical confrontation), and (3)  
570ambiguous behaviour in which the nature of interactions between the two or more actors was unclear (average  
571connectivity matrices for each state shown in Figure S4).

572A repeated measure ANOVA was then conducted for each connection using these average connectivity values with one  
573between-subject factor: monkey (three levels, monkeys M1-M3), and one within-subject factor: social interactions

574(three levels, affiliative/aggressive/ambiguous). The statistics obtained from this analysis were used to create a single  
575matrix of z-stats for each connection. From this matrix, only connections with a z-stat>1.66 (representing the strongest  
57615% of total connections) were considered for further analysis. To determine essential or central nodes in the network,  
577two measures were calculated from the resulting binary matrix of social modulated connections using the Brain  
578Connectivity Toolbox (Rubinov & Sporns, 2010). Firstly, for each ROI, the degree or number of connections to the ROI  
579was calculated. Secondly, the importance of each ROI was assessed by calculating eigenvector centrality. Eigenvector  
580centrality is biased toward well-connected nodes. Therefore, ROIs with high eigenvector centrality are not only well  
581connected within a network but have a lot of connections to other well connected ROIs.

582To explicitly link changes in connectivity to the specific types of behaviour, an additional analysis was conducted in  
583which changes in connectivity were examined after the onset of clips containing each of the three behaviour types  
584(aggressive, affiliative, or ambiguous behaviour). We aligned 11-s segments of phase synchrony time-series (3 s pre- to  
5858 s post clip onset) with a 2-s delay to allow for the haemodynamic response. The aligned time series were then  
586interpolated using a cubic spline and averaged from the strongest 15% of connections between five anatomical  
587groupings: cingulate-cingulate connections, cingulate-temporal connections and temporo-temporal connections,  
588premotor-cingulate connection and premotor-temporal connections (including connections within and across  
589hemispheres). To identify statistically significant increases in synchrony relative to baseline for different behaviours,  
590these clip-triggered averages were compared to randomised surrogate data (generated around the average mean  
591synchrony and variance of the pre-onset triggered time-course) using one-tailed t-tests. Significant p-values were  
592cluster-corrected to  $p < 0.05$ .

- 593 REFERENCE LIST
- 594 Aharon, I., Etcoff, N., Ariely, D., Chabris, C. F., O'Connor, E., & Breiter, H. C. (2001). Beautiful faces have variable  
595 reward value: fMRI and behavioral evidence. *Neuron*, 32(3), 537-551. doi:10.1016/s0896-6273(01)00491-3
- 596 Ainsworth, M., Browncross, H., Mitchell, D. J., Mitchell, A. S., Passingham, R. E., Buckley, M. J., . . . Bell, A. H.  
597 (2018). Functional reorganisation and recovery following cortical lesions: A preliminary study in macaque  
598 monkeys. *Neuropsychologia*, 119, 382-391. doi:10.1016/j.neuropsychologia.2018.08.024
- 599 Alves, P. N., Foulon, C., Karolis, V., Bzdok, D., Margulies, D. S., Volle, E., & Thiebaut de Schotten, M. (2019).  
600 Subcortical Anatomy of the Default Mode Network: a functional and structural connectivity study. *bioRxiv*, 528679.  
601 doi:10.1101/528679
- 602 Apps, M. A., & Ramnani, N. (2014). The anterior cingulate gyrus signals the net value of others' rewards. *J Neurosci*,  
603 34(18), 6190-6200. doi:10.1523/JNEUROSCI.2701-13.2014
- 604 Arioli, M., & Canessa, N. (2019). Neural processing of social interaction: Coordinate-based meta-analytic evidence  
605 from human neuroimaging studies. *Hum Brain Mapp*. doi:10.1002/hbm.24627
- 606 Azzi, J. C., Sirigu, A., & Duhamel, J. R. (2012). Modulation of value representation by social context in the primate  
607 orbitofrontal cortex. *Proc Natl Acad Sci U S A*, 109(6), 2126-2131. doi:10.1073/pnas.1111715109
- 608 Baez-Mendoza, R., Harris, C. J., & Schultz, W. (2013). Activity of striatal neurons reflects social action and own  
609 reward. *Proc Natl Acad Sci U S A*, 110(41), 16634-16639. doi:10.1073/pnas.1211342110
- 610 Baez-Mendoza, R., van Coeverden, C. R., & Schultz, W. (2016). A neuronal reward inequity signal in primate striatum.  
611 *J Neurophysiol*, 115(1), 68-79. doi:10.1152/jn.00321.2015
- 612 Baumann, S., Joly, O., Rees, A., Petkov, C. I., Sun, L., Thiele, A., & Griffiths, T. D. (2015). The topography of  
613 frequency and time representation in primate auditory cortices. *Elife*, 4. doi:10.7554/eLife.03256
- 614 Behrens, T. E., Hunt, L. T., & Rushworth, M. F. (2009). The computation of social behavior. *Science*, 324(5931), 1160-  
615 1164. doi:10.1126/science.1169694
- 616 Behrens, T. E., Hunt, L. T., Woolrich, M. W., & Rushworth, M. F. (2008). Associative learning of social value. *Nature*,  
617 456(7219), 245-249. doi:10.1038/nature07538
- 618 Bell, A. H., Hadj-Bouziane, F., Frihauf, J. B., Tootell, R. B., & Ungerleider, L. G. (2009). Object representations in the  
619 temporal cortex of monkeys and humans as revealed by functional magnetic resonance imaging. *J Neurophysiol*,  
620 101(2), 688-700. doi:10.1152/jn.90657.2008
- 621 Bell, A. H., Malecek, N. J., Morin, E. L., Hadj-Bouziane, F., Tootell, R. B., & Ungerleider, L. G. (2011). Relationship  
622 between functional magnetic resonance imaging-identified regions and neuronal category selectivity. *J Neurosci*,  
623 31(34), 12229-12240. doi:10.1523/JNEUROSCI.5865-10.2011
- 624 Bruce, V., & Young, A. (1986). Understanding face recognition. *Br J Psychol*, 77 ( Pt 3), 305-327. Retrieved from  
625 <https://www.ncbi.nlm.nih.gov/pubmed/3756376>
- 626 Chang, C., Liu, Z., Chen, M. C., Liu, X., & Duyn, J. H. (2013). EEG correlates of time-varying BOLD functional  
627 connectivity. *Neuroimage*, 72, 227-236. doi:10.1016/j.neuroimage.2013.01.049
- 628 Chang, S. W., Garipey, J. F., & Platt, M. L. (2013). Neuronal reference frames for social decisions in primate frontal  
629 cortex. *Nat Neurosci*, 16(2), 243-250. doi:10.1038/nn.3287
- 630 Chau, B. K., Sallet, J., Papageorgiou, G. K., Noonan, M. P., Bell, A. H., Walton, M. E., & Rushworth, M. F. (2015).  
631 Contrasting Roles for Orbitofrontal Cortex and Amygdala in Credit Assignment and Learning in Macaques. *Neuron*,  
632 87(5), 1106-1118. doi:10.1016/j.neuron.2015.08.018
- 633 Coudé, G., Festante, F., Cilia, A., Loiacono, V., Bimbi, M., Fogassi, L., & Ferrari, P. F. (2016). Mirror Neurons of  
634 Ventral Premotor Cortex Are Modulated by Social Cues Provided by Others' Gaze. *J Neurosci*, 36(11), 3145-3156;  
635 doi: 10.1523/JNEUROSCI.3220-15.2016
- 636 Cox, R. W. (1996). AFNI: software for analysis and visualization of functional magnetic resonance neuroimages.  
637 *Comput Biomed Res*, 29(3), 162-173. Retrieved from <https://www.ncbi.nlm.nih.gov/pubmed/8812068>
- 638 Dal Monte, O., Chu, C.C.J., Fagan, N.A., Chang, S.W.C. (2020). Specialized medial prefrontal-amygdala coordination  
639 in other-regarding decision preference. *Nature Neuroscience*. doi: 10.1038/s41593-020-0593-y
- 640 Diehl, M. M., & Romanski, L. M. (2014). Responses of prefrontal multisensory neurons to mismatching faces and  
641 vocalizations. *J Neurosci*, 34(34), 11233-11243. doi:10.1523/JNEUROSCI.5168-13.2014
- 642 Downing, P. E., Jiang, Y., Shuman, M., & Kanwisher, N. (2001). A cortical area selective for visual processing of the  
643 human body. *Science*, 293(5539), 2470-2473. doi:10.1126/science.1063414
- 644 Downing, P. E., Peelen, M. V., Wiggett, A. J., & Tew, B. D. (2006). The role of the extrastriate body area in action  
645 perception. *Soc Neurosci*, 1(1), 52-62. doi:10.1080/17470910600668854
- 646 Dunbar, R. I., & Shultz, S. (2007). Evolution in the social brain. *Science*, 317(5843), 1344-1347.  
647 doi:10.1126/science.1145463
- 648 Ebisch, S. J. H., Gallese, V., Salone, A., Martinotti, G., di Iorio, G., Mantini, D., Northoff, G. (2018). Disrupted  
649 relationship between "resting state" connectivity and task-evoked activity during social perception in schizophrenia.  
650 *Schizophr Res*, 193, 370-376. doi:10.1016/j.schres.2017.07.020
- 651 Fatfouta, R., Meshi, D., Merkl, A., & Heekeren, H. R. (2018). Accepting unfairness by a significant other is associated  
652 with reduced connectivity between medial prefrontal and dorsal anterior cingulate cortex. *Soc Neurosci*, 13(1), 61-  
653 73. doi:10.1080/17470919.2016.1252795
- 654 Ferrari, P. F., Gallese, V., Rizzolatti, G., Fogassi, L. (2003) Mirror neurons responding to the observation of ingestive  
655 and communicative mouth actions in the monkey ventral premotor cortex. *Eur. J. Neurosci*, 17, 1703-1714.

- 656 doi:10.1046/j.1460-9528.2003.02601.x
- 657 Gallese, V., Fadiga, L., Fogassi, L., & Rizzolatti, G. (1996). Action recognition in the premotor cortex. *Brain*, 119(2),  
658 593-609. doi:10.1093/brain/119.2.593
- 659 Gardner, T., Goulden, N., & Cross, E. S. (2015). Dynamic modulation of the action observation network by movement  
660 familiarity. *J Neurosci*, 35(4), 1561-1572. doi:10.1523/JNEUROSCI.2942-14.2015
- 661 Grabenhorst, F., Báez-Mendoza, R., Genest, W., Deco, G., & Schultz, W. (2019). Primate Amygdala Neurons Simulate  
662 Decision Processes of Social Partners. *Cell*, 177(4), 986-998.e915. doi:10.1016/j.cell.2019.02.042
- 663 Greve, D. N., & Fischl, B. (2009). Accurate and robust brain image alignment using boundary-based registration.  
664 *Neuroimage*, 48(1), 63-72. doi:10.1016/j.neuroimage.2009.06.060
- 665 Hadj-Bouziiane, F., Bell, A. H., Knusten, T. A., Ungerleider, L. G., & Tootell, R. B. (2008). Perception of emotional  
666 expressions is independent of face selectivity in monkey inferior temporal cortex. *Proc Natl Acad Sci U S A*,  
667 105(14), 5591-5596. doi:10.1073/pnas.0800489105
- 668 Haroush, K., & Williams, Ziv M. (2015). Neuronal Prediction of Opponent's Behavior during Cooperative Social  
669 Interchange in Primates. *Cell*, 160(6), 1233-1245. doi:10.1016/j.cell.2015.01.045
- 670 Hasson, U., Nir, Y., Levy, I., Fuhrmann, G., Malach, R. (2004). Intersubject synchronization of cortical activity during  
671 natural vision. *Science*, 303(5664), 1634-40. doi:10.1126/science.1089506
- 672 Hill, M. R., Boorman, E. D., & Fried, I. (2016). Observational learning computations in neurons of the human anterior  
673 cingulate cortex. *Nat Commun*, 7, 12722. doi:10.1038/ncomms12722
- 674 Hutchison, R. M., Womelsdorf, T., Gati, J. S., Everling, S., & Menon, R. S. (2013). Resting-state networks show  
675 dynamic functional connectivity in awake humans and anesthetized macaques. *Hum Brain Mapp*, 34(9), 2154-2177.  
676 doi:10.1002/hbm.22058
- 677 Izuma, K., Saito, D. N., & Sadato, N. (2008). Processing of social and monetary rewards in the human striatum.  
678 *Neuron*, 58(2), 284-294. doi:10.1016/j.neuron.2008.03.020
- 679 Jenkinson, M., Bannister, P., Brady, M., & Smith, S. (2002). Improved optimization for the robust and accurate linear  
680 registration and motion correction of brain images. *Neuroimage*, 17(2), 825-841. Retrieved from  
681 <https://www.ncbi.nlm.nih.gov/pubmed/12377157>
- 682 Jenkinson, M., Beckmann, C. F., Behrens, T. E., Woolrich, M. W., & Smith, S. M. (2012). FSL. *Neuroimage*, 62(2),  
683 782-790. doi:10.1016/j.neuroimage.2011.09.015
- 684 Jenkinson, M., & Smith, S. (2001). A global optimisation method for robust affine registration of brain images. *Med  
685 Image Anal*, 5(2), 143-156. Retrieved from <https://www.ncbi.nlm.nih.gov/pubmed/11516708>
- 686 Jimenez, A. M., Riedel, P., Lee, J., Reavis, E. A., & Green, M. F. (2019). Linking resting-state networks and social  
687 cognition in schizophrenia and bipolar disorder. *Hum Brain Mapp*, 40(16), 4703-4715. doi:10.1002/hbm.24731
- 688 Joly, O., Baumann, S., Balezeau, F., Thiele, A., & Griffiths, T. D. (2014). Merging functional and structural properties  
689 of the monkey auditory cortex. *Front Neurosci*, 8, 198. doi:10.3389/fnins.2014.00198
- 690 Jones, D. T., Vemuri, P., Murphy, M. C., Gunter, J. L., Senjem, M. L., Machulda, M. M., . . . Jack, C. R., Jr. (2012).  
691 Non-stationarity in the "resting brain's" modular architecture. *PLoS One*, 7(6), e39731.  
692 doi:10.1371/journal.pone.0039731
- 693 Kanwisher, N., McDermott, J., & Chun, M. M. (1997). The fusiform face area: a module in human extrastriate cortex  
694 specialized for face perception. *J Neurosci*, 17(11), 4302-4311. Retrieved from  
695 <https://www.ncbi.nlm.nih.gov/pubmed/9151747>
- 696 Kolster, H., Janssens, T., Orban, G. A., & Vanduffel, W. (2014). The retinotopic organization of macaque  
697 occipitotemporal cortex anterior to V4 and caudoventral to the middle temporal (MT) cluster. *J Neurosci*, 34(31),  
698 10168-10191. doi:10.1523/JNEUROSCI.3288-13.2014
- 699 Kolster, H., Mandeville, J. B., Arsenault, J. T., Ekstrom, L. B., Wald, L. L., & Vanduffel, W. (2009). Visual field map  
700 clusters in macaque extrastriate visual cortex. *J Neurosci*, 29(21), 7031-7039. doi:10.1523/JNEUROSCI.0518-  
701 09.2009
- 702 Koster-Hale, J., & Saxe, R. (2013). Theory of mind: a neural prediction problem. *Neuron*, 79(5), 836-848.  
703 doi:10.1016/j.neuron.2013.08.020
- 704 Kudo, H., & Dunbar, R. I. M. (2001). Neocortex size and social network size in primates. *Animal Behaviour*, 62(4),  
705 711-722. doi:10.1006/anbe.2001.1808
- 706 Liao, W., Qiu, C., Gentili, C., Walter, M., Pan, Z., Ding, J., . . . Chen, H. (2010). Altered effective connectivity network  
707 of the amygdala in social anxiety disorder: a resting-state fMRI study. *PLoS One*, 5(12), e15238.  
708 doi:10.1371/journal.pone.0015238
- 709 Lockwood, P. L., & Wittmann, M. K. (2018). Ventral anterior cingulate cortex and social decision-making. *Neurosci  
710 Biobehav Rev*, 92, 187-191. doi:10.1016/j.neubiorev.2018.05.030
- 711 Mantini, D., Gerits, K., Durand, J.B., Joly, O., Simone, L., Sawamura, H., Wardak, C., Orban, G.A., Buckner, R.L.,  
712 Vanduffel, W., (2011) Default mode of brain function in monkeys. *J Neurosci* 31(36) 12945-12962.  
713 doi:10.1523/JNEUROSCI.2318-11.2011
- 714 Mars, R. B., Neubert, F. X., Noonan, M. P., Sallet, J., Toni, I., & Rushworth, M. F. (2012). On the relationship between  
715 the "default mode network" and the "social brain". *Front Hum Neurosci*, 6, 189. doi:10.3389/fnhum.2012.00189
- 716 Mars, R. B., Sallet, J., Neubert, F. X., & Rushworth, M. F. (2013). Connectivity profiles reveal the relationship between  
717 brain areas for social cognition in human and monkey temporoparietal cortex. *Proc Natl Acad Sci U S A*, 110(26),  
718 10806-10811. doi:10.1073/pnas.1302956110



- 719McCarthy, G., Puce, A., Gore, J. C., & Allison, T. (1997). Face-specific processing in the human fusiform gyrus. *J Cogn Neurosci*, *9*(5), 605-610. doi:10.1162/jocn.1997.9.5.605
- 721Mitchell, D. J., Bell, A. H., Buckley, M. J., Mitchell, A. S., Sallet, J., & Duncan, J. (2016). A Putative Multiple-Demand System in the Macaque Brain. *J Neurosci*, *36*(33), 8574-8585. doi:10.1523/JNEUROSCI.0810-16.2016
- 723Molenberghs, P., Johnson, H., Henry, J. D., & Mattingley, J. B. (2016). Understanding the minds of others: A neuroimaging meta-analysis. *Neurosci Biobehav Rev*, *65*, 276-291. doi:10.1016/j.neubiorev.2016.03.020
- 725Nelissen, K., Borra, E., Gerbella, M., Rozzi, S., Luppino, G., Vanduffel, W., Rizzolatti, G., Orban, G.A., (2011). Action Observation Circuits in the Macaque Monkey Cortex. *J Neurosci* *31*(10),3743-3756. doi:10.1523/JNEUROSCI.4803-10.2011
- 728Noonan, M. P., Sallet, J., Mars, R. B., Neubert, F. X., O'Reilly, J. X., Andersson, J. L., . . . Rushworth, M. F. (2014). A neural circuit covarying with social hierarchy in macaques. *PLoS Biol*, *12*(9), e1001940. doi:10.1371/journal.pbio.1001940
- 731Palva, J. M., Palva, S., & Kaila, K. (2005). Phase synchrony among neuronal oscillations in the human cortex. *J Neurosci*, *25*(15), 3962-3972. doi:10.1523/JNEUROSCI.4250-04.2005
- 733Peelen, M. V., Wiggett, A. J., & Downing, P. E. (2006). Patterns of fMRI activity dissociate overlapping functional brain areas that respond to biological motion. *Neuron*, *49*(6), 815-822. doi:10.1016/j.neuron.2006.02.004
- 735Peirce, J. W. (2007). PsychoPy--Psychophysics software in Python. *J Neurosci Methods*, *162*(1-2), 8-13. doi:10.1016/j.jneumeth.2006.11.017
- 737Pinsk, M. A., Arcaro, M., Weiner, K. S., Kalkus, J. F., Inati, S. J., Gross, C. G., & Kastner, S. (2009). Neural representations of faces and body parts in macaque and human cortex: a comparative fMRI study. *J Neurophysiol*, *101*(5), 2581-2600. doi:10.1152/jn.91198.2008
- 740Platt, M. L., Seyfarth, R. M., & Cheney, D. L. (2016). Adaptations for social cognition in the primate brain. *Philos Trans R Soc Lond B Biol Sci*, *371*(1687), 20150096. doi:10.1098/rstb.2015.0096
- 742Popivanov, I. D., Jastorff, J., Vanduffel, W., & Vogels, R. (2012). Stimulus representations in body-selective regions of the macaque cortex assessed with event-related fMRI. *Neuroimage*, *63*(2), 723-741. doi:10.1016/j.neuroimage.2012.07.013
- 745Power, J. D., Barnes, K. A., Snyder, A. Z., Schlaggar, B. L., & Petersen, S. E. (2012). Spurious but systematic correlations in functional connectivity MRI networks arise from subject motion. *Neuroimage*, *59*(3), 2142-2154. doi:10.1016/j.neuroimage.2011.10.018
- 748Rabany, L., Diefenbach, G. J., Bragdon, L. B., Pittman, B. P., Zertuche, L., Tolin, D. F., . . . Assaf, M. (2017). Resting-State Functional Connectivity in Generalized Anxiety Disorder and Social Anxiety Disorder: Evidence for a Dimensional Approach. *Brain Connect*, *7*(5), 289-298. doi:10.1089/brain.2017.0497
- 751Rizzolatti, G., & Sinigaglia, C. (2010). The functional role of the parieto-frontal mirror circuit: interpretations and misinterpretations. *Nat Rev Neurosci*, *11*(4), 264-274. doi:10.1038/nrn2805
- 753Romanski, L. M., & Diehl, M. M. (2011). Neurons responsive to face-view in the primate ventrolateral prefrontal cortex. *Neuroscience*, *189*, 223-235. doi:10.1016/j.neuroscience.2011.05.014
- 755Rosenblum, M. G., Pikovsky, A. S., & Kurths, J. (1996). Phase synchronization of chaotic oscillators. *Phys Rev Lett*, *76*(11), 1804-1807. doi:10.1103/PhysRevLett.76.1804
- 757Rubinov, M., & Sporns, O. (2010). Complex network measures of brain connectivity: uses and interpretations. *Neuroimage*, *52*(3), 1059-1069. doi:10.1016/j.neuroimage.2009.10.003
- 759Rudebeck, P. H., Buckley, M. J., Walton, M. E., & Rushworth, M. F. (2006). A role for the macaque anterior cingulate gyrus in social valuation. *Science*, *313*(5791), 1310-1312. doi:10.1126/science.1128197
- 761Russ B.E., Leopold D.A. (2015). Functional MRI mapping of dynamic visual features during natural viewing in the macaque. *Neuroimage*, *109*, 84-94. doi: 10.1016/j.neuroimage.2015.01.012
- 763Sallet, J., Mars, R. B., Noonan, M. P., Andersson, J. L., O'Reilly, J. X., Jbabdi, S., . . . Rushworth, M. F. (2011). Social network size affects neural circuits in macaques. *Science*, *334*(6056), 697-700. doi:10.1126/science.1210027
- 765Sallet, J., Mars, R. B., Noonan, M. P., Neubert, F. X., Jbabdi, S., O'Reilly, J. X., . . . Rushworth, M. F. (2013). The organization of dorsal frontal cortex in humans and macaques. *J Neurosci*, *33*(30), 12255-12274. doi:10.1523/JNEUROSCI.5108-12.2013
- 768Sapey-Triomphe, L.-A., Centelles, L., Roth, M., Fonlupt, P., Hénaff, M.-A., Schmitz, C., & Assaiante, C. (2017). Deciphering human motion to discriminate social interactions: a developmental neuroimaging study. *Social Cognitive and Affective Neuroscience*, *12*(2), 340-351. doi:10.1093/scan/nsw117
- 771Saxe, R., & Kanwisher, N. (2003). People thinking about thinking people. The role of the temporo-parietal junction in "theory of mind". *Neuroimage*, *19*(4), 1835-1842. Retrieved from <https://www.ncbi.nlm.nih.gov/pubmed/12948738>
- 773Saxe, R., Xiao, D. K., Kovacs, G., Perrett, D. I., & Kanwisher, N. (2004). A region of right posterior superior temporal sulcus responds to observed intentional actions. *Neuropsychologia*, *42*(11), 1435-1446. doi:10.1016/j.neuropsychologia.2004.04.015
- 776Scalaidhe, S. P., Wilson, F. A., & Goldman-Rakic, P. S. (1999). Face-selective neurons during passive viewing and working memory performance of rhesus monkeys: evidence for intrinsic specialization of neuronal coding. *Cereb Cortex*, *9*(5), 459-475. doi:10.1093/cercor/9.5.459
- 779Schulke, O., Bhagavatula, J., Vigilant, L., & Ostner, J. (2010). Social bonds enhance reproductive success in male macaques. *Curr Biol*, *20*(24), 2207-2210. doi:10.1016/j.cub.2010.10.058
- 781Seidlitz, J., Sponheim, C., Glen, D., Ye, F. Q., Saleem, K. S., Leopold, D. A., . . . Messinger, A. (2018). A population

782 MRI brain template and analysis tools for the macaque. *Neuroimage*, 170, 121-131.  
783 doi:10.1016/j.neuroimage.2017.04.063

784Sergent, J., Ohta, S., & MacDonald, B. (1992). Functional neuroanatomy of face and object processing. A positron  
785 emission tomography study. *Brain*, 115 Pt 1, 15-36. doi:10.1093/brain/115.1.15

786Sescousse, G., Li, Y., & Dreher, J. C. (2015). A common currency for the computation of motivational values in the  
787 human striatum. *Social Cognitive and Affective Neuroscience*, 10(4), 467-473. doi:10.1093/scan/nsu074

788Sliwa, J., & Freiwald, W. A. (2017). A dedicated network for social interaction processing in the primate brain.  
789 *Science*, 356(6339), 745-749. doi:10.1126/science.aam6383

790Tsao, D. Y., Moeller, S., & Freiwald, W. A. (2008). Comparing face patch systems in macaques and humans. *Proc Natl*  
791 *Acad Sci USA*, 105(49), 19514-19519. doi:10.1073/pnas.0809662105

792Tsao, D. Y., Schweers, N., Moeller, S., & Freiwald, W. A. (2008). Patches of face-selective cortex in the macaque  
793 frontal lobe. *Nat Neurosci*, 11(8), 877-879. doi:10.1038/nn.2158

794Van Essen, D. C., Glasser, M. F., Dierker, D. L., & Harwell, J. (2012). Cortical parcellations of the macaque monkey  
795 analyzed on surface-based atlases. *Cereb Cortex*, 22(10), 2227-2240. doi:10.1093/cercor/bhr290

796Viviano, J. D., Buchanan, R. W., Calarco, N., Gold, J. M., Foussias, G., Bhagwat, N., . . . Social Processes Initiative in  
797 Neurobiology of the Schizophrenia, G. (2018). Resting-State Connectivity Biomarkers of Cognitive Performance  
798 and Social Function in Individuals With Schizophrenia Spectrum Disorder and Healthy Control Subjects. *Biol*  
799 *Psychiatry*, 84(9), 665-674. doi:10.1016/j.biopsych.2018.03.013

800Wagner, D. D., Haxby, J. V., & Heatherton, T. F. (2012). The representation of self and person knowledge in the medial  
801 prefrontal cortex. *Wiley Interdiscip Rev Cogn Sci*, 3(4), 451-470. doi:10.1002/wcs.1183

802Wagner, D. D., Kelley, W. M., Haxby, J. V., & Heatherton, T. F. (2016). The Dorsal Medial Prefrontal Cortex  
803 Responds Preferentially to Social Interactions during Natural Viewing. *Journal of Neuroscience*, 36(26), 6917-6925.  
804 doi:10.1523/jneurosci.4220-15.2016

805Watson, Karli K., & Platt, Michael L. (2012). Social Signals in Primate Orbitofrontal Cortex. *Current Biology*, 22(23),  
806 2268-2273. doi:10.1016/j.cub.2012.10.016

807Wittmann, M. K., Kolling, N., Faber, N. S., Scholl, J., Nelissen, N., & Rushworth, M. F. (2016). Self-Other Mergence  
808 in the Frontal Cortex during Cooperation and Competition. *Neuron*, 91(2), 482-493.  
809 doi:10.1016/j.neuron.2016.06.022

810Wittmann, M. K., Lockwood, P. L., & Rushworth, M. F. S. (2018). Neural Mechanisms of Social Cognition in  
811 Primates. *Annu Rev Neurosci*, 41, 99-118. doi:10.1146/annurev-neuro-080317-061450

812Woolrich, M. W., Behrens, T. E., Beckmann, C. F., Jenkinson, M., & Smith, S. M. (2004). Multilevel linear modelling  
813 for FMRI group analysis using Bayesian inference. *Neuroimage*, 21(4), 1732-1747.  
814 doi:10.1016/j.neuroimage.2003.12.023

815Yoshida, K., Saito, N., Iriki, A., & Isoda, M. (2011). Representation of Others' Action by Neurons in Monkey Medial  
816 Frontal Cortex. *Current Biology*, 21(3), 249-253. doi:10.1016/j.cub.2011.01.004

817Yoshida, K., Saito, N., Iriki, A., & Isoda, M. (2012). Social error monitoring in macaque frontal cortex. *Nat Neurosci*,  
818 15(9), 1307-1312. doi:10.1038/nn.3180

819Zhang, Y., Brady, M., & Smith, S. (2001). Segmentation of brain MR images through a hidden Markov random field  
820 model and the expectation-maximization algorithm. *IEEE Trans Med Imaging*, 20(1), 45-57. doi:10.1109/42.906424

821Zhu, H., Qiu, C., Meng, Y., Yuan, M., Zhang, Y., Ren, Z., . . . Zhang, W. (2017). Altered Topological Properties of  
822 Brain Networks in Social Anxiety Disorder: A Resting-state Functional MRI Study. *Scientific reports*, 7, 43089.  
823 doi:10.1038/srep43089



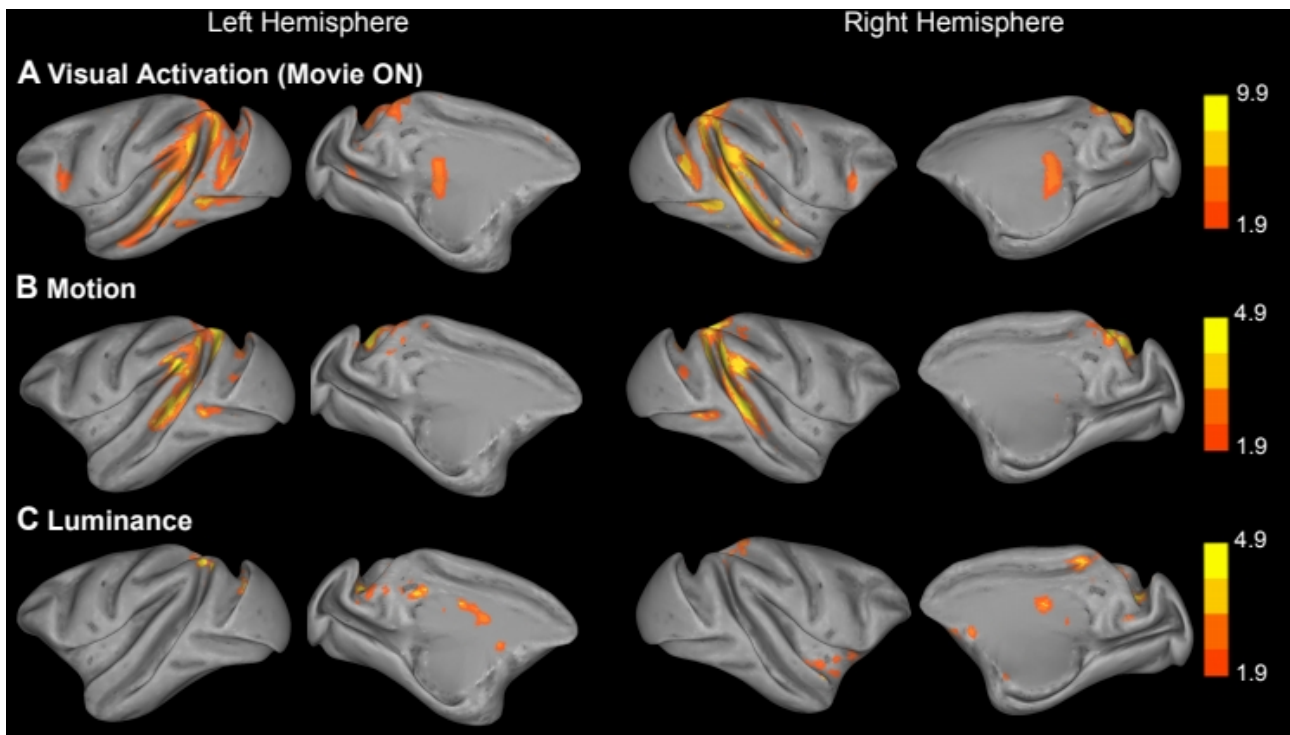

**Supplementary Figure 1**

824  
825 **Figure S1. Cortical activation associated with low level visual video features.** A-C. Inflated brains showing  
826 significant clusters from three contrasts of low level visual features calculated from the videos. All data presented are  
827 from the third level, GLM analysis with combining activation from all three animals. The contrasts include; the basic visual  
828 activation during each session (video ON/OFF, **A**), the motion within the video, calculated by a block matching algorithm  
829 examining differences between frames of the video content (See METHODS AND MATERIALS for details, **B**), and the  
830 luminance of the video scenes (**C**). Note the differences in scales as different thresholds ( $z\text{-stat} > 6.5$   $z\text{-stat} > 1.9$  and  $z\text{-stat} > 1.9$ ) were applied to the data shown in A-C respectively, and all images were cluster corrected at  $p < 0.05$ .

832

833

834

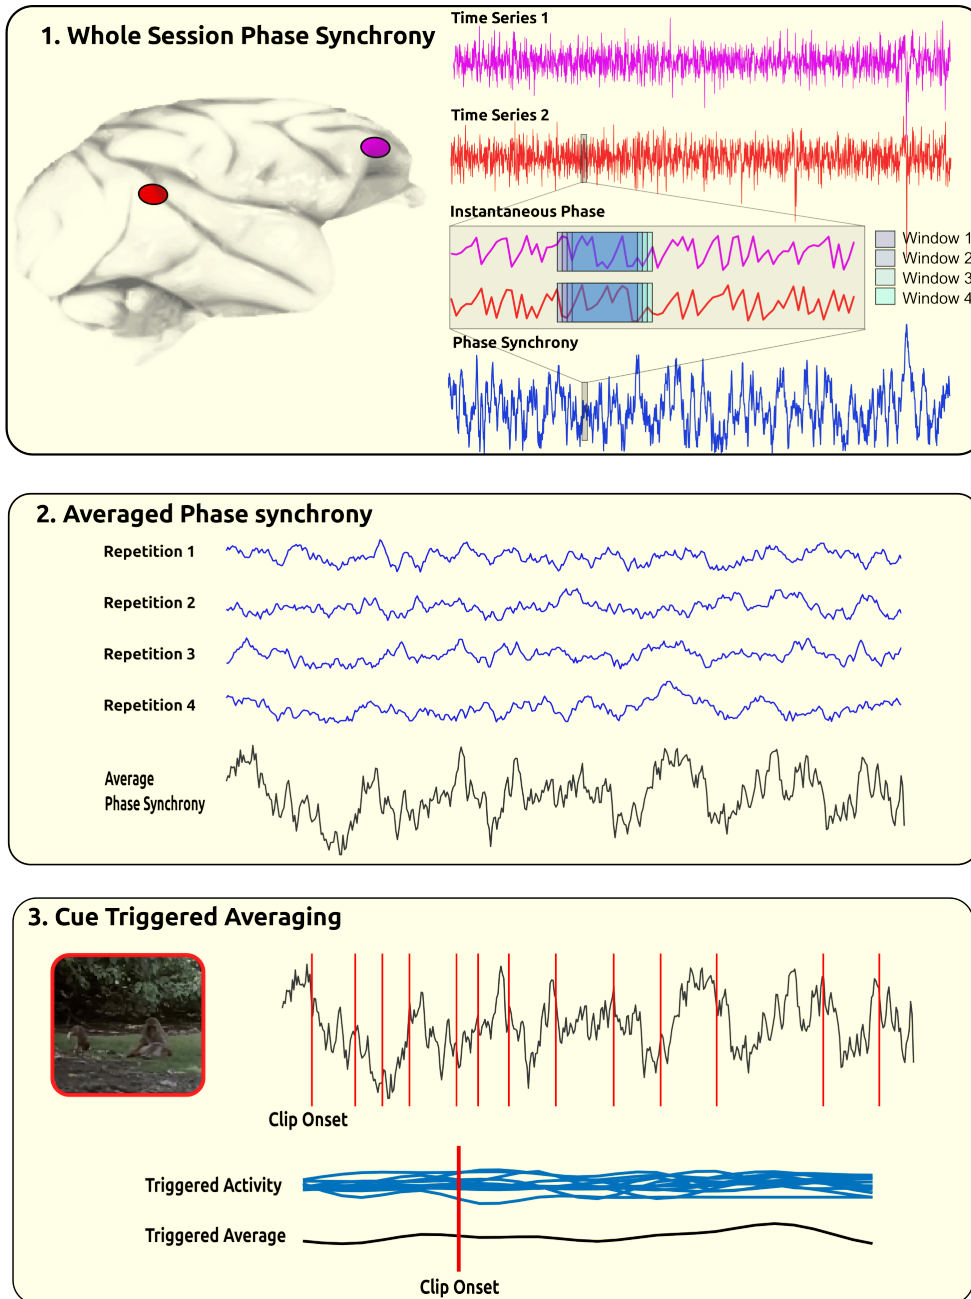

Supplementary Figure 2

836**Figure S2. Assessing network connectivity using phase synchrony.** 1. Example whole session bold timeseries (after  
837pre-processing & concatenation of individual runs) from one prefrontal (magenta) and one temporal (red) ROI. Phase  
838synchrony was calculated between the instantaneous phase of both timeseries over the whole session using a window of  
83932 sec, overlapping the previous window by 30 sec (four overlapping windows shown inset). 2. Whole session phase  
840synchrony was averaged by the number of repeated runs (three or four repeats per session) in the session to yield a  
841single time-series corresponding to the 440 volumes of unique video content. 3. Clip onset triggered averaged were  
842calculated from time-series aligned to the relevant clip onset (aggressive behaviour pictured) and averaged across the  
843strongest 15% of connections between five groups (cingulate-cingulate, cingulate-temporal, premotor-cingulate,  
844premotor-temporal and temporo-temporal).

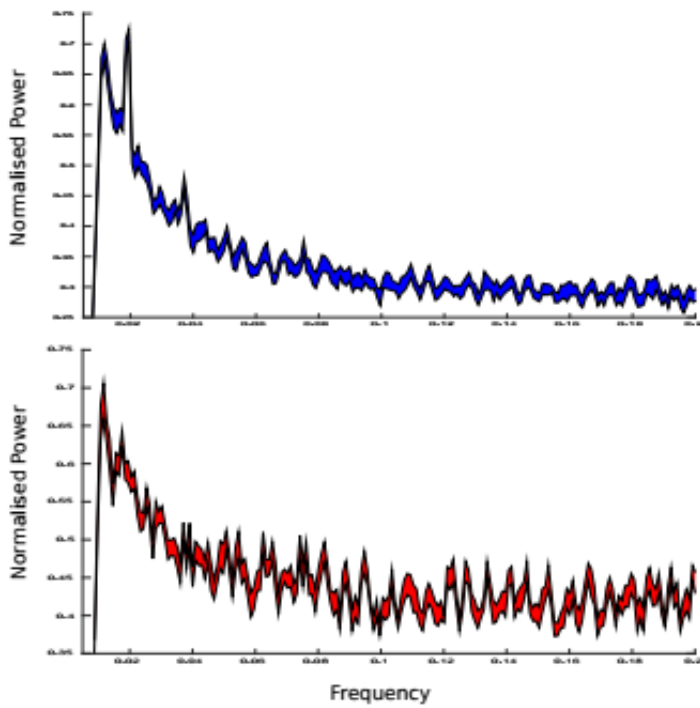

**Supplementary Figure 3**

846**Figure S3. The frequency of BOLD timeseries in frontal and temporal lobes.** Spectrograms calculated from the  
847BOLD fMRI timeseries after filtering at 0.01Hz showing the average frequency content of the BOLD timeseries at ROIs in  
848the temporal lobe (*top, blue*) and frontal lobe (*red, lower*) .

849

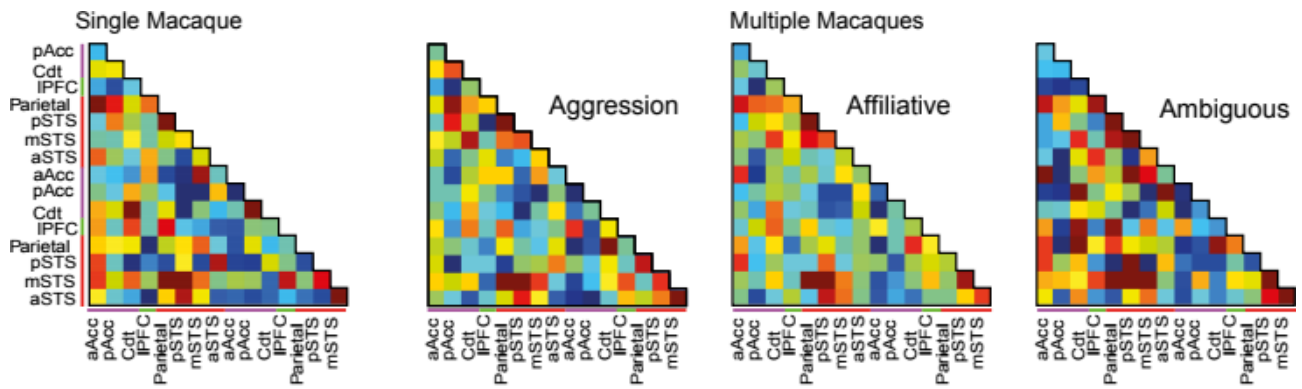

850

### Supplementary Figure 4

851**Figure S4. Core network connectivity associated with social video features.** Average connectivity matrices  
852calculated from scenes featuring single macaques as well as three matrices corresponding to scenes during which  
853monkeys viewed multiple macaques engaged in three different types of behaviour (aggressive, affiliative, and ambiguous  
854behaviour).
